# Supplementary material for: Expression analysis of candidate genes for fatty acid composition in adipose tissue and identification of regulatory regions
Source: PubMed Central journal article supplement (PMC5794915; doi:10.1038/s41598-018-20473-3), 2018-02-01
Supplement: 41598_2018_20473_MOESM1_ESM.pdf [file 41598_2018_20473_MOESM1_ESM.pdf]

## SUPPLEMENTARY MATERIAL

### Expression analysis of candidate genes for fatty acid composition in adipose tissue and identification of regulatory regions

Manuel Revilla<sup>1,2\*</sup>, Anna Puig-Oliveras<sup>1,2</sup>, Daniel Crespo-Piazuelo<sup>1,2</sup>, Lourdes Criado-Mesas<sup>1,2</sup>, Anna Castelló<sup>1,2</sup>, Ana I Fernández<sup>3</sup>, Maria Ballester<sup>4†</sup>, Josep M Folch<sup>1,2†</sup>

<sup>1</sup> Animal Genomics Department, Centre for Research in Agricultural Genomics (CRAG), CSIC-IRTA-UAB-UB, Campus UAB, 08193 Bellaterra, Spain

<sup>2</sup> Departament de Ciència Animal i dels Aliments, Facultat de Veterinària, Universitat Autònoma de Barcelona (UAB), 08193 Bellaterra, Spain

<sup>3</sup> Departamento de Genética Animal, Instituto Nacional de Investigación y Tecnología Agraria y Alimentaria (INIA), 28040 Madrid, Spain

<sup>4</sup> Departament de Genètica i Millora Animal, Institut de Recerca i Tecnologia Agroalimentàries (IRTA), Torre Marimon, 08140 Caldes de Montbui, Spain

\* E-mail: [manuel.revilla@cragenomica.es](mailto:manuel.revilla@cragenomica.es)

† Equal contribution

**Figure S1.** GWAS plot of *ELOVL6* and *SLC27A4A* gene expression in adipose tissue. The X-axis represents chromosome positions in Mb relative to *Sscrofa10.2* assembly of the pig genome and the Y-axis shows the  $-\log_{10}$  ( $p$ -value). Horizontal dashed lines indicate the genome-wide significance level. Plot of eGWAS for (A) *ELOVL6*, and (B) *SLC27A4* gene expression in backfat.

**Figure S2.** Associations of SNPs from SSC8 and *ELOVL6* polymorphisms for *ELOVL6* gene expression in backfat. The X-axis represents positions of SSC8 in Mb relative to *Sscrofa10.2* assembly of the pig genome and the Y-axis shows the  $-\log_{10}$  ( $p$ -value). Horizontal dashed lines indicate the chromosome significance level.

**Figure S3.** Clustered heat map to visualize correlations among gene expression levels (NQ) of the 43 genes and fatty content in adipose tissue. Color legend was adjusted to minimal and maximal values to differentiate the differences.

**Figure S4.** Clustered heat map to visualize correlations among gene expression levels (NQ) of the 43 genes and fatty content in muscle. Color legend was adjusted to minimal and maximal values to differentiate the differences.

**Table S1.** List of 44 lipid-related genes selected to study their expression in the present study. The overlapping between categories is labelled by colors.

**Table S2.** Description of the 193 significant expression-associated SNPs (eSNPs).

**Table S3.** Transcription factor binding sites for *PPARG* in the *ACSM5* promoter region gene.

**Table S4.** Transcription factor binding site for *SREBF1* in the *FADS2* promoter region gene.

**Table S5.** Gene annotation of genes within the eQTL intervals. Annotation was performed by considering for *trans*-eQTLs the eQTL interval  $\pm 1$  Mb; whereas for *cis*-eQTLs only the studied gene was selected (*ACSM5*, *FABP4*, and *FADS2*).

**Table S6.** Mean comparison between males and females of backfat gene expression levels of 43 lipid-related genes.

**Table S7.** Description of the 393 human orthologous genes.

**Table S8.** Top functional networks and molecules identified with IPA from the list of annotated genes mapping within the 19 eQTLs.

**Table S9.** Transcription factor binding sites for the *PPARG* gene.

**Table S10.** Pearson's correlations of *PPARG* mRNA expression and analyze-related genes.

**Table S11.** Primers used for the characterization of the 3'UTR of porcine *FABP4* gene.

**Table S12.** Primers used for the analyses of gene expression of the 48 genes by real-time PCR.

**Figure S1.** GWAS plot of *ELOVL6* and *SLC27A4* gene expression in adipose tissue. The X-axis represents chromosome positions in Mb relative to *Sscrofa10.2* assembly of the pig genome and the Y-axis shows the  $-\log_{10}(p\text{-value})$ . Horizontal dashed lines indicate the genome-wide significance level. Plot of eGWAS for (A) *ELOVL6*, and (B) *SLC27A4* gene expression in backfat.

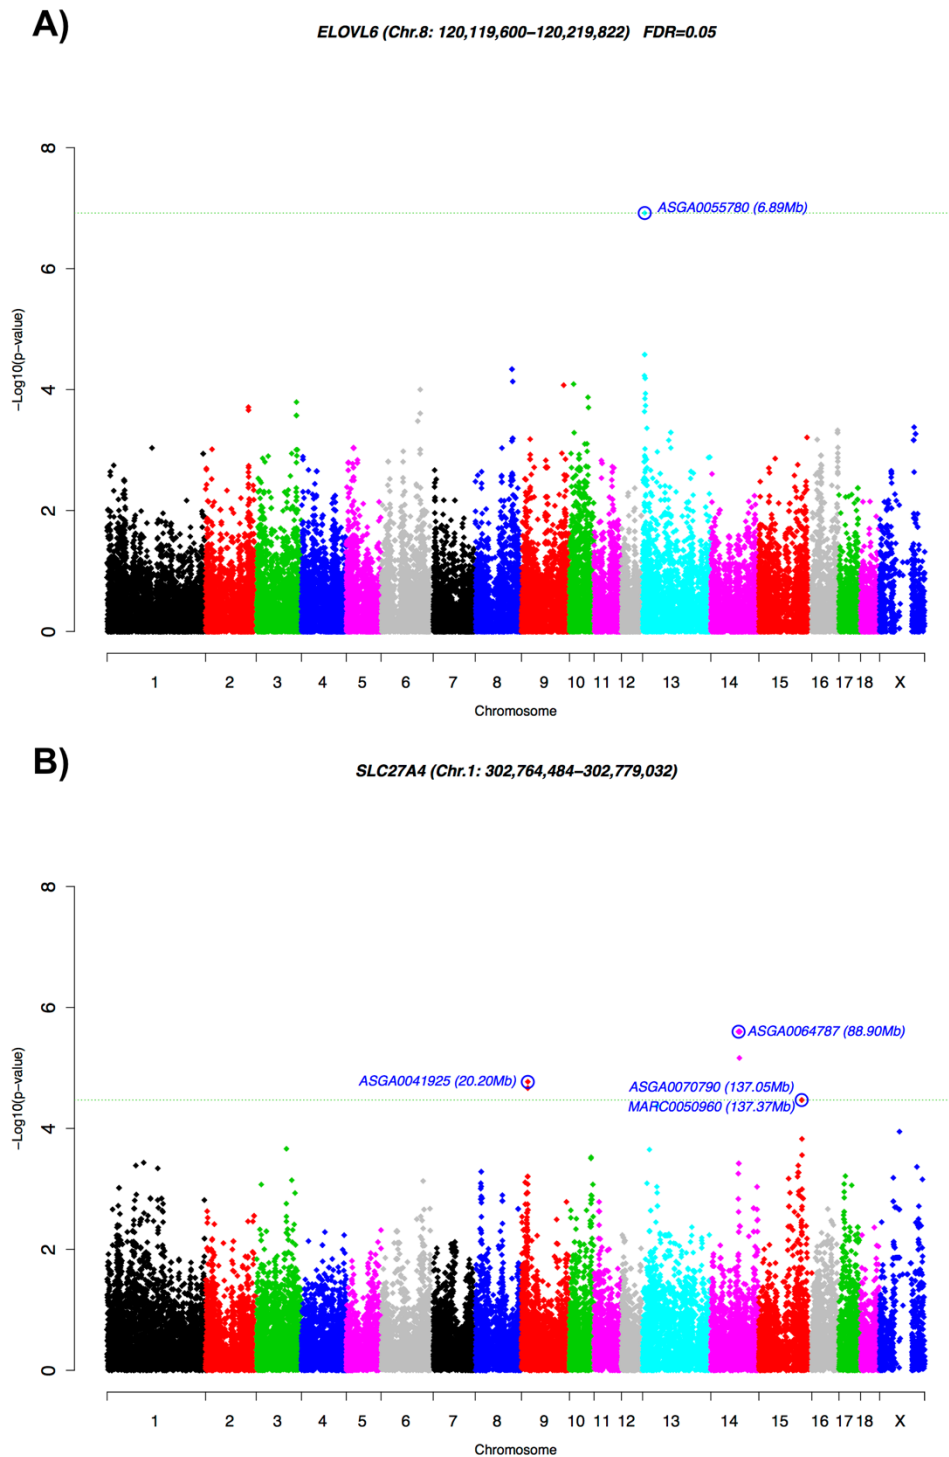

**Figure S2.** Associations of SNPs from SSC8 and *ELOVL6* polymorphisms for *ELOVL6* gene expression in backfat. The X-axis represents positions of SSC8 in Mb relative to *Sscrofa10.2* assembly of the pig genome and the Y-axis shows the  $-\log_{10}(p\text{-value})$ . Horizontal dashed lines indicate the chromosome significance level.

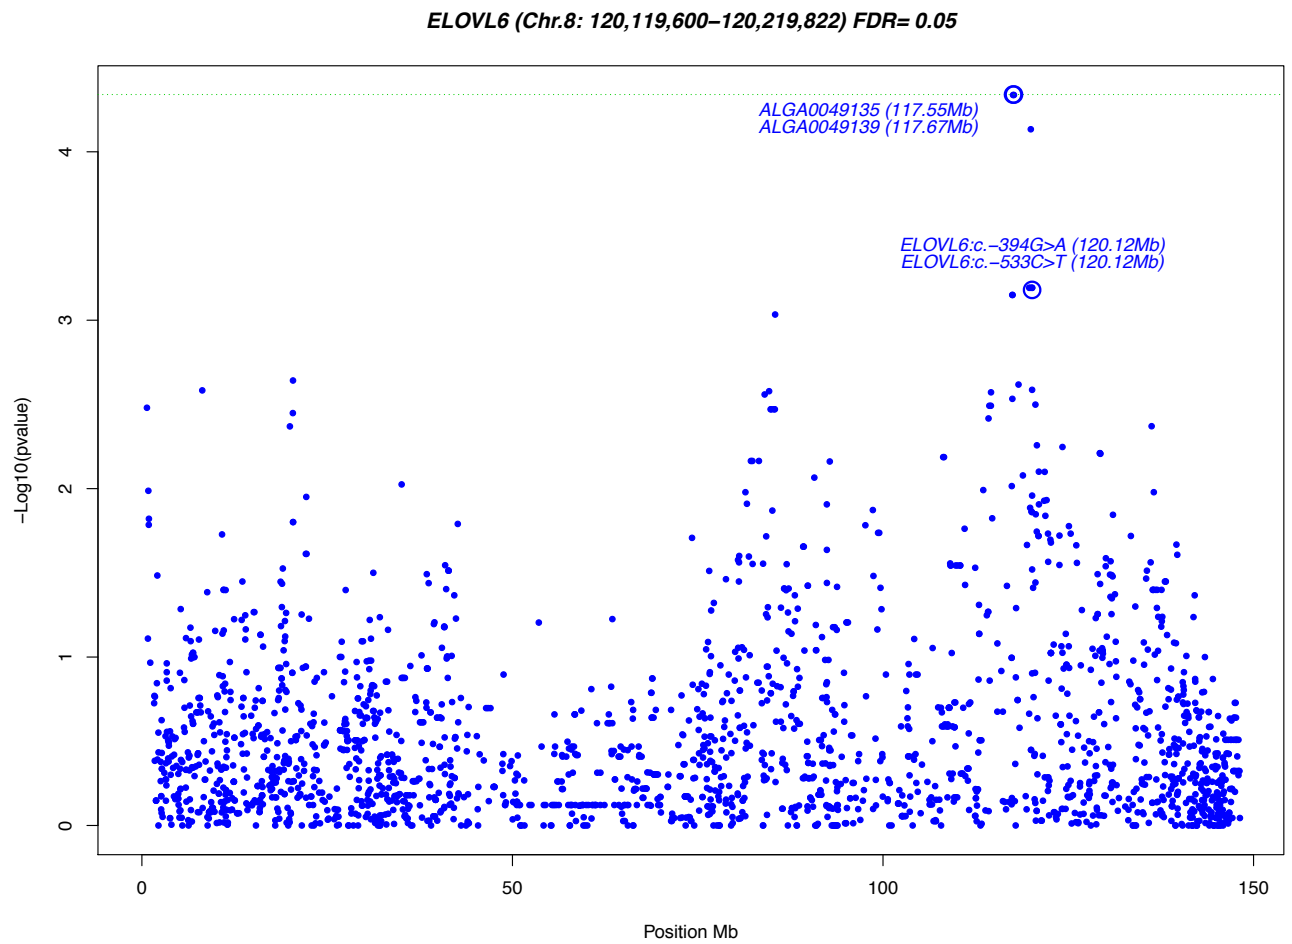

**Figure S3.** Clustered heat map to visualize correlations among gene expression levels (NQ) of the 43 genes and fatty content in adipose tissue. Color legend was adjusted to minimal and maximal values to differentiate the differences.

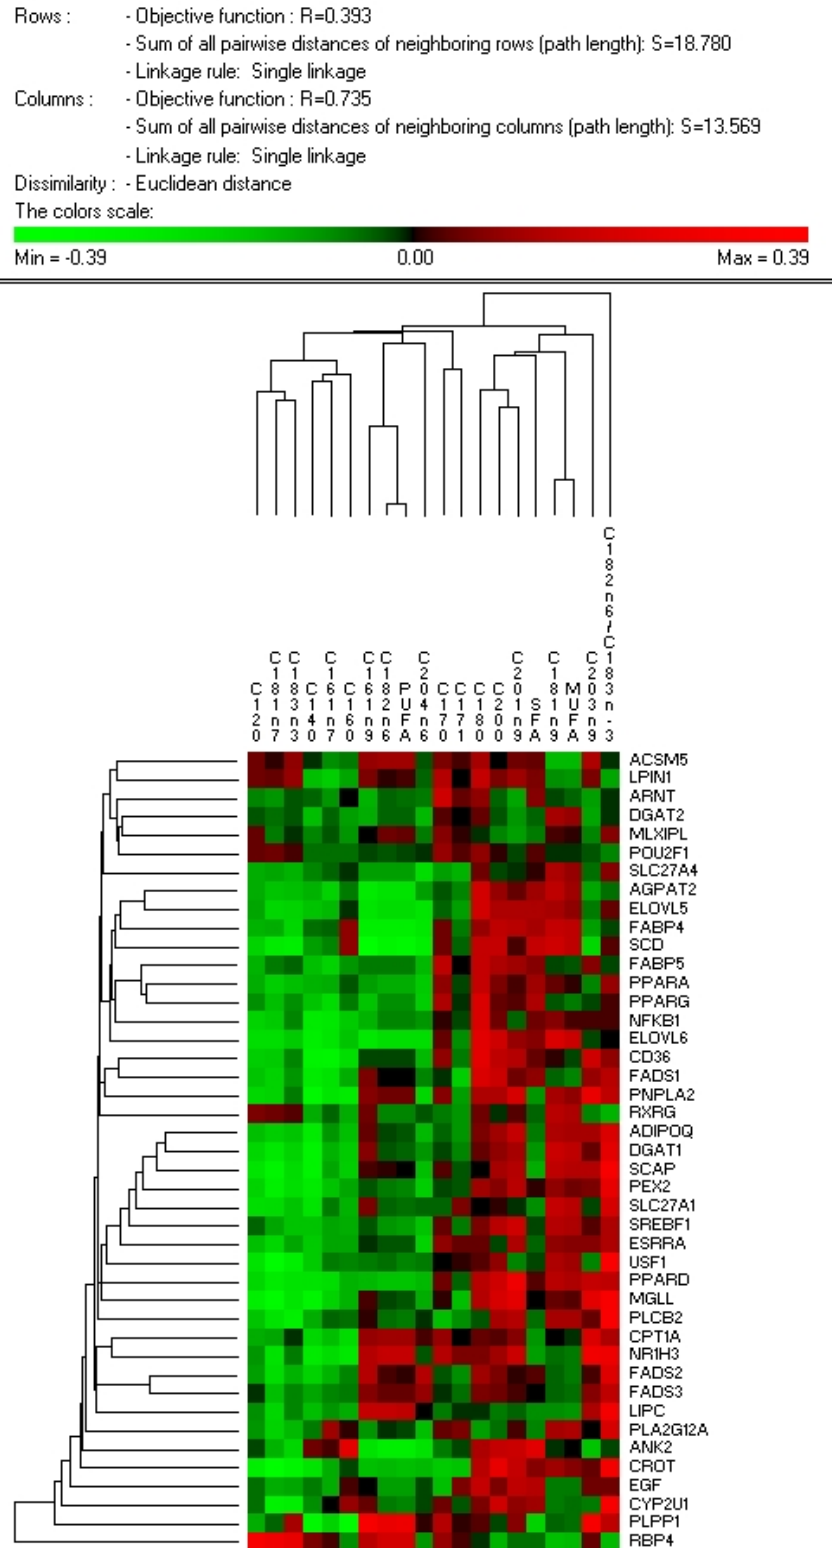

**Figure S4.** Clustered heat map to visualize correlations among gene expression levels (NQ) of the 43 genes and fatty content in muscle. Color legend was adjusted to minimal and maximal values to differentiate the differences.

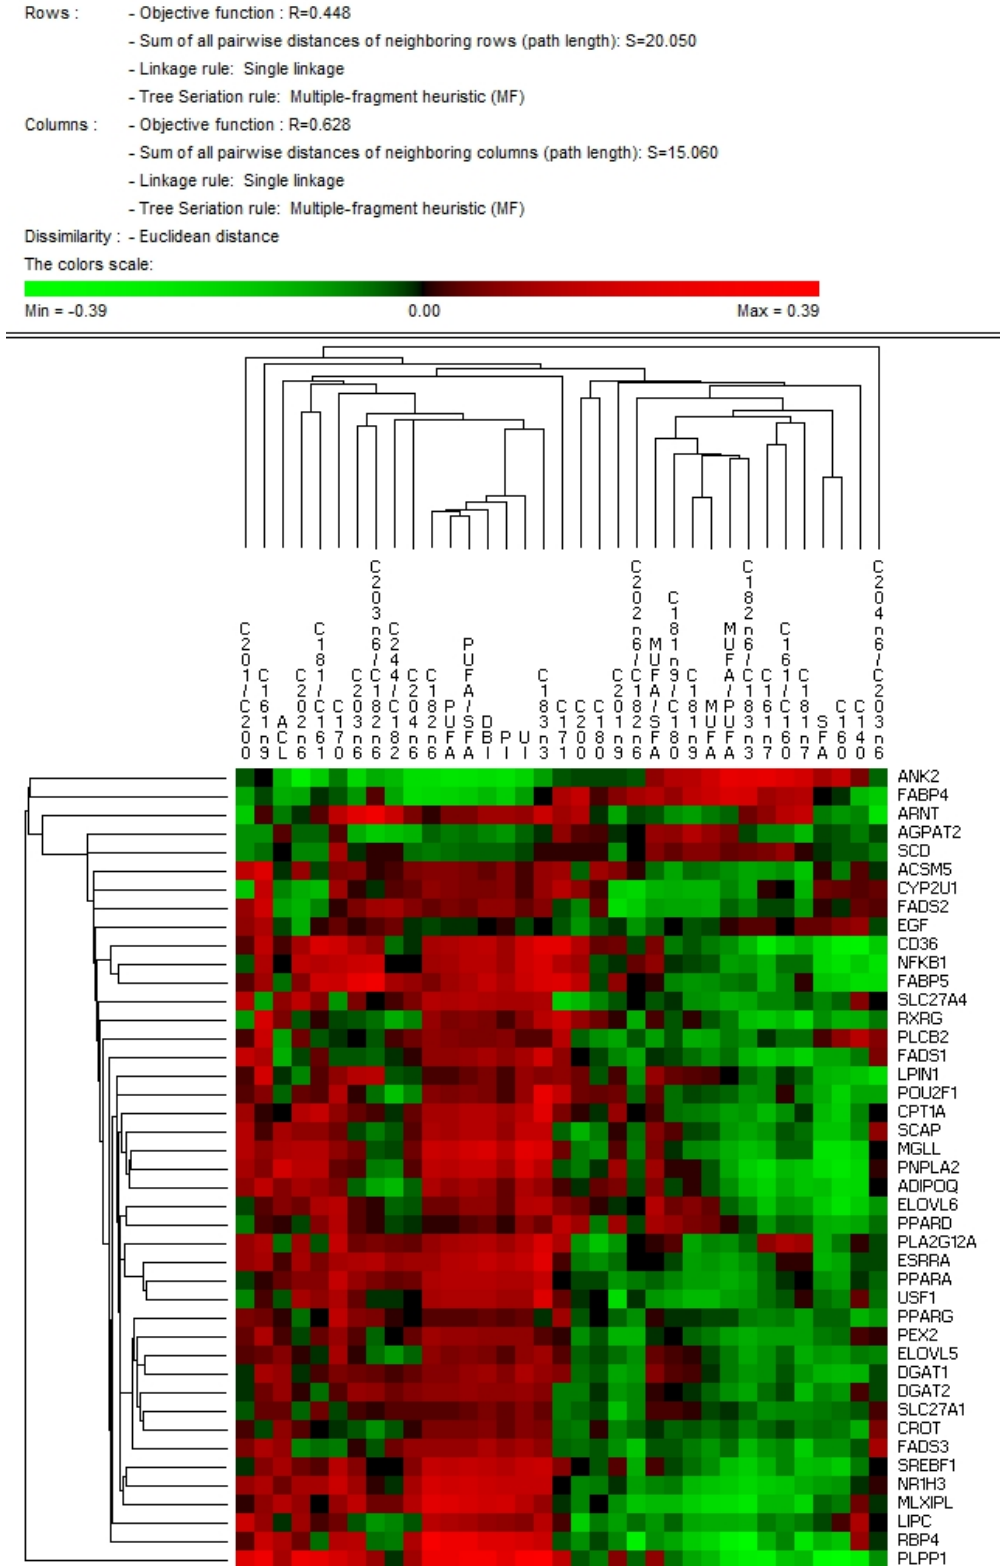

**Table S1.** List of 44 lipid-related genes selected to study their expression in the present study. The overlapping between categories is labelled by colors.

| Description                                                                                                                                                              | Bibliographic reference | Genes                                                                                                       |
|--------------------------------------------------------------------------------------------------------------------------------------------------------------------------|-------------------------|-------------------------------------------------------------------------------------------------------------|
| Candidate functional and positional genes identified in a GWAS study for intramuscular FA composition in the BC1_LD backcross                                            | [5]                     | <i>ARNT, CYP2U1, EGF, ELOVL6, FABP4, FABP5, FADS1, FADS2, FADS3, NFKB1, PLA2G12A, PLCB2, PLPP1 and USF1</i> |
| Genes differentially expressed by RNA-Seq in the adipose tissue of two phenotypically extreme groups of animals for intramuscular FA composition in the BC1_LD backcross | [17]                    | <i>ELOVL6 and SCD</i>                                                                                       |
| Candidate positional gene affecting palmitic and palmitoleic FA in pigs                                                                                                  | [18]                    | <i>ELOVL6</i>                                                                                               |
| Genes related to lipid metabolism identified in gene co-association networks for FA composition in the BC1_LD backcross                                                  | [19]                    | <i>ACSM5, ANK2, ARNT, FABP4, FABP5, MGLL and PPARG</i>                                                      |
| Genes related to lipid metabolism identified in gene co-association networks for fatness and growth related traits in the IBSMAP cross                                   | [20]                    | <i>ARNT and PPARG</i>                                                                                       |
| Candidate positional genes identified in a GWAS study for backfat FA composition in the BC1_LD backcross                                                                 | [21]                    | <i>FADS1, FADS2 and FADS3</i>                                                                               |
| Transporters involved in lipid metabolism                                                                                                                                |                         | <i>RBP4, SCAP, SLC27A1 and SLC27A4</i>                                                                      |
| Enzymes involved in lipid metabolism                                                                                                                                     |                         | <i>AGPAT2, CPT1A, CROT, DGAT1, DGAT2, ELOVL5, LIPC, LPIN1, PEX2 and PNPLA2</i>                              |
| Transcriptional factors, cofactors or nuclear receptors involved in lipid metabolism                                                                                     |                         | <i>CD36, ESRRA, MLXIPL, NR1H3, POU2F1, PPARA, PPARD, PPARGC1A, RXRG and SREBF1</i>                          |
| Adipokine of white fat tissue                                                                                                                                            | [22]                    | <i>ADIPOQ</i>                                                                                               |



**Table S2.** Description of the 193 significant expression-associated SNPs (eSNPs).

| Interval | Chr | SNP         | Position (bp) | fA1  | fA2  | p-value                 | q-value                | Associated Gene | Consequence | Ensembl_Geneld      | Gene Id | Cis/Trans-eSNPs |
|----------|-----|-------------|---------------|------|------|-------------------------|------------------------|-----------------|-------------|---------------------|---------|-----------------|
| I1       | 2   | ASGA0093797 | 134992155     | 0.94 | 0.06 | 1.55x10 <sup>-6</sup>   | 5.48x10 <sup>-4</sup>  | ACSM5           | intergenic  | -                   | -       | trans           |
| I2       | 3   | ASGA0089930 | 16473829      | 0.74 | 0.26 | 4.45x10 <sup>-6</sup>   | 1.30x10 <sup>-3</sup>  | ACSM5           | intergenic  | -                   | -       | trans           |
| I2       | 3   | H3GA0053939 | 18724340      | 0.90 | 0.10 | 3.75x10 <sup>-6</sup>   | 1.17x10 <sup>-3</sup>  | ACSM5           | intronic    | ENSSSCG00000007804  | SH2B1   | trans           |
| I2       | 3   | ASGA0101457 | 18742778      | 0.90 | 0.10 | 3.03x10 <sup>-7</sup>   | 1.22 x10 <sup>-4</sup> | ACSM5           | intronic    | ENSSSCG00000007805  | ATP2A1  | trans           |
| I2       | 3   | ALGA0112844 | 19373384      | 0.67 | 0.33 | 3.66x10 <sup>-8</sup>   | 1.84x10 <sup>-5</sup>  | ACSM5           | intronic    | ENSSSCG00000022785  | GSG1L   | trans           |
| I2       | 3   | ASGA0098276 | 21286903      | 0.82 | 0.18 | 1.69x10 <sup>-14</sup>  | 1.70x10 <sup>-11</sup> | ACSM5           | intergenic  | -                   | -       | cis             |
| I2       | 3   | ALGA0017974 | 21309417      | 0.77 | 0.23 | 1.22x10 <sup>-15</sup>  | 1.51x10 <sup>-12</sup> | ACSM5           | intergenic  | -                   | -       | cis             |
| I2       | 3   | ASGA0013836 | 21387300      | 0.77 | 0.23 | 6.97x10 <sup>-10</sup>  | 4.76x10 <sup>-7</sup>  | ACSM5           | intergenic  | -                   | -       | cis             |
| I2       | 3   | ALGA0017987 | 21528275      | 0.53 | 0.47 | 2.68x10 <sup>-5</sup>   | 6.75x10 <sup>-3</sup>  | ACSM5           | intergenic  | -                   | -       | cis             |
| I2       | 3   | ASGA0013852 | 21562254      | 0.73 | 0.27 | 5.69x10 <sup>-8</sup>   | 2.79x10 <sup>-5</sup>  | ACSM5           | intergenic  | -                   | -       | cis             |
| I2       | 3   | ALGA0123606 | 21777886      | 0.63 | 0.37 | 7.13x10 <sup>-11</sup>  | 5.66x10 <sup>-8</sup>  | ACSM5           | intergenic  | -                   | -       | cis             |
| I2       | 3   | ASGA0089383 | 22771385      | 0.50 | 0.50 | 1.19 x10 <sup>-10</sup> | 8.93x10 <sup>-8</sup>  | ACSM5           | intronic    | ENSSSCG00000007831  | CACNG3  | cis             |
| I2       | 3   | MARC0101247 | 22772065      | 0.88 | 0.12 | 1.96x10 <sup>-6</sup>   | 6.52x10 <sup>-4</sup>  | ACSM5           | intronic    | ENSSSCG00000007831  | CACNG3  | cis             |
| I2       | 3   | ASGA0094123 | 22794781      | 0.84 | 0.16 | 7.97x10 <sup>-6</sup>   | 2.23x10 <sup>-3</sup>  | ACSM5           | intronic    | ENSSSCG00000007831  | CACNG3  | cis             |
| I2       | 3   | ALGA0018006 | 23015607      | 0.70 | 0.30 | 1.08x10 <sup>-7</sup>   | 4.86x10 <sup>-5</sup>  | ACSM5           | intergenic  | -                   | -       | cis             |
| I2       | 3   | ALGA0018040 | 23224453      | 0.66 | 0.34 | 3.33x10 <sup>-16</sup>  | 4.39x10 <sup>-13</sup> | ACSM5           | intergenic  | -                   | -       | cis             |
| I2       | 3   | ASGA0098738 | 23442184      | 0.73 | 0.27 | 1.11x10 <sup>-17</sup>  | 1.57x10 <sup>-14</sup> | ACSM5           | downstream  | ENSSSCG00000007836  | SCNN1G  | cis             |
| I2       | 3   | ALGA0103397 | 23522898      | 0.73 | 0.27 | 1.11x10 <sup>-17</sup>  | 1.57x10 <sup>-14</sup> | ACSM5           | upstream    | ENSSSCG000000030424 | -       | cis             |
| I2       | 3   | ALGA0123533 | 23592793      | 0.60 | 0.40 | 7.20x10 <sup>-11</sup>  | 5.66x10 <sup>-8</sup>  | ACSM5           | intergenic  | -                   | -       | cis             |
| I2       | 3   | MARC0041570 | 23603118      | 0.73 | 0.27 | 1.11x10 <sup>-17</sup>  | 1.57x10 <sup>-14</sup> | ACSM5           | downstream  | ENSSSCG00000026544  | USP31   | cis             |
| I2       | 3   | ASGA0093175 | 23778733      | 0.80 | 0.20 | 1.11x10 <sup>-17</sup>  | 1.57x10 <sup>-14</sup> | ACSM5           | intronic    | ENSSSCG00000007837  | HS3ST2  | cis             |
| I2       | 3   | MARC0003844 | 23802761      | 0.80 | 0.20 | 1.11x10 <sup>-17</sup>  | 1.57x10 <sup>-14</sup> | ACSM5           | intronic    | ENSSSCG00000007837  | HS3ST2  | cis             |
| I2       | 3   | MARC0047020 | 23961903      | 0.73 | 0.27 | 1.11x10 <sup>-17</sup>  | 1.57x10 <sup>-14</sup> | ACSM5           | intergenic  | -                   | -       | cis             |

| Interval | Chr | SNP         | Position (bp) | fA1  | fA2  | p-value                | q-value                | Associated Gene | Consequence         | Ensembl_Geneld      | Gene Id | Cis/Trans-eSNPs |
|----------|-----|-------------|---------------|------|------|------------------------|------------------------|-----------------|---------------------|---------------------|---------|-----------------|
| I2       | 3   | ASGA0103399 | 24010664      | 0.75 | 0.25 | 1.11x10 <sup>-17</sup> | 1.57x10 <sup>-14</sup> | ACSM5           | downstream          | ENSSSCG00000007838  | OTOA    | cis             |
| I2       | 3   | ALGA0112358 | 24025177      | 0.80 | 0.20 | 4.93x10 <sup>-11</sup> | 4.10x10 <sup>-8</sup>  | ACSM5           | intronic            | ENSSSCG00000007838  | OTOA    | cis             |
| I2       | 3   | ALGA0123020 | 24042892      | 0.78 | 0.22 | 7.14x10 <sup>-13</sup> | 6.50x10 <sup>-10</sup> | ACSM5           | intronic            | ENSSSCG00000007838  | OTOA    | cis             |
| I2       | 3   | ASGA0094818 | 24086731      | 0.33 | 0.67 | 2.69x10 <sup>-05</sup> | 6.75x10 <sup>-3</sup>  | ACSM5           | intergenic          | -                   | -       | cis             |
| I2       | 3   | ALGA0115152 | 24218664      | 0.53 | 0.47 | 2.08x10 <sup>-07</sup> | 8.84x10 <sup>-5</sup>  | ACSM5           | intergenic          | -                   | -       | cis             |
| I2       | 3   | ASGA0094620 | 24288043      | 0.71 | 0.29 | 2.22x10 <sup>-15</sup> | 2.43x10 <sup>-12</sup> | ACSM5           | 3_prime_UTR_variant | ENSSSCG00000007839  | EEF2K   | cis             |
| I2       | 3   | ASGA0089883 | 24297157      | 0.71 | 0.29 | 2.22x10 <sup>-15</sup> | 2.43x10 <sup>-12</sup> | ACSM5           | intronic            | ENSSSCG00000007839  | EEF2K   | cis             |
| I2       | 3   | ASGA0099261 | 24299990      | 0.84 | 0.16 | 6.93x10 <sup>-14</sup> | 6.47x10 <sup>-11</sup> | ACSM5           | intronic            | ENSSSCG00000007839  | EEF2K   | cis             |
| I2       | 3   | ALGA0103433 | 24365103      | 0.40 | 0.60 | 4.04x10 <sup>-05</sup> | 9.20x10 <sup>-3</sup>  | ACSM5           | intronic            | ENSSSCG00000007839  | EEF2K   | cis             |
| I2       | 3   | MARC0006151 | 24387052      | 0.47 | 0.53 | 2.70x10 <sup>-05</sup> | 6.75x10 <sup>-3</sup>  | ACSM5           | intronic            | ENSSSCG00000007839  | EEF2K   | cis             |
| I2       | 3   | ASGA0101242 | 24418411      | 0.77 | 0.23 | 1.11x10 <sup>-17</sup> | 1.57x10 <sup>-14</sup> | ACSM5           | downstream          | ENSSSCG00000007842  | SDR42E2 | cis             |
| I2       | 3   | ASGA0013894 | 24602938      | 0.53 | 0.47 | 4.46x10 <sup>-08</sup> | 2.22x10 <sup>-5</sup>  | ACSM5           | upstream            | ENSSSCG000000027510 | -       | cis             |
| I2       | 3   | MARC0110831 | 25162049      | 0.84 | 0.16 | 6.93x10 <sup>-14</sup> | 6.47x10 <sup>-11</sup> | ACSM5           | intronic            | ENSSSCG00000007847  | -       | cis             |
| I2       | 3   | MARC0115165 | 25531453      | 0.80 | 0.20 | 4.93x10 <sup>-11</sup> | 4.10x10 <sup>-8</sup>  | ACSM5           | upstream            | ENSSSCG00000007849  | CRYM    | cis             |
| I2       | 3   | ASGA0085542 | 25695049      | 0.73 | 0.27 | 1.11x10 <sup>-17</sup> | 1.57x10 <sup>-14</sup> | ACSM5           | intergenic          | -                   | -       | cis             |
| I2       | 3   | MARC0060700 | 25794656      | 0.67 | 0.33 | 1.11x10 <sup>-16</sup> | 1.57x10 <sup>-13</sup> | ACSM5           | intergenic          | -                   | -       | cis             |
| I2       | 3   | ASGA0013904 | 25862724      | 0.74 | 0.26 | 1.11x10 <sup>-17</sup> | 1.57x10 <sup>-14</sup> | ACSM5           | intergenic          | -                   | -       | cis             |
| I2       | 3   | ASGA0013906 | 25939787      | 0.73 | 0.27 | 1.11x10 <sup>-17</sup> | 1.57x10 <sup>-14</sup> | ACSM5           | upstream            | ENSSSCG00000007853  | LYRM1   | cis             |
| I2       | 3   | ALGA0018079 | 25957412      | 0.73 | 0.27 | 1.11x10 <sup>-17</sup> | 1.57x10 <sup>-14</sup> | ACSM5           | intergenic          | -                   | -       | cis             |
| I2       | 3   | ASGA0095840 | 25990903      | 0.74 | 0.26 | 1.11x10 <sup>-17</sup> | 1.57x10 <sup>-14</sup> | ACSM5           | intronic            | ENSSSCG00000007855  | -       | cis             |
| I2       | 3   | MARC0108510 | 26002460      | 0.74 | 0.26 | 1.11x10 <sup>-17</sup> | 1.57x10 <sup>-14</sup> | ACSM5           | intronic            | ENSSSCG00000007855  | -       | cis             |
| I2       | 3   | ALGA0108097 | 26045382      | 0.74 | 0.26 | 1.11x10 <sup>-17</sup> | 1.57x10 <sup>-14</sup> | ACSM5           | intronic            | ENSSSCG00000007857  | ACSM3   | cis             |
| I2       | 3   | ASGA0103234 | 26183486      | 0.66 | 0.34 | 8.18x10 <sup>-12</sup> | 7.28x10 <sup>-9</sup>  | ACSM5           | intronic            | ENSSSCG000000026453 | ACSM5   | cis             |
| I2       | 3   | ASGA0085560 | 26316304      | 0.76 | 0.24 | 1.11x10 <sup>-17</sup> | 1.57x10 <sup>-14</sup> | ACSM5           | intergenic          | -                   | -       | cis             |
| I2       | 3   | H3GA0053928 | 26392557      | 0.71 | 0.29 | 3.40x10 <sup>-14</sup> | 3.34x10 <sup>-11</sup> | ACSM5           | intergenic          | -                   | -       | cis             |

| Interval | Chr | SNP         | Position (bp) | fA1  | fA2  | p-value                | q-value                | Associated Gene | Consequence | Ensembl_Geneld     | Gene Id | Cis/Trans-eSNPs |
|----------|-----|-------------|---------------|------|------|------------------------|------------------------|-----------------|-------------|--------------------|---------|-----------------|
| I2       | 3   | MARC0101263 | 26425965      | 0.83 | 0.17 | 1.11x10 <sup>-17</sup> | 1.57x10 <sup>-14</sup> | ACSM5           | intergenic  | -                  | -       | cis             |
| I2       | 3   | MARC0050331 | 26428824      | 0.79 | 0.21 | 4.44x10 <sup>-16</sup> | 5.66x10 <sup>-13</sup> | ACSM5           | intergenic  | -                  | -       | cis             |
| I2       | 3   | MARC0019934 | 26488381      | 0.34 | 0.66 | 1.36x10 <sup>-5</sup>  | 3.61x10 <sup>-3</sup>  | ACSM5           | intergenic  | -                  | -       | cis             |
| I2       | 3   | MARC0007734 | 26517625      | 0.66 | 0.34 | 1.56x10 <sup>-10</sup> | 1.15x10 <sup>-7</sup>  | ACSM5           | intergenic  | -                  | -       | cis             |
| I2       | 3   | MARC0052941 | 26537702      | 0.73 | 0.27 | 1.11x10 <sup>-17</sup> | 1.57x10 <sup>-14</sup> | ACSM5           | downstream  | ENSSSCG00000007862 | GPR139  | cis             |
| I2       | 3   | ALGA0018104 | 26631496      | 0.49 | 0.51 | 1.89x10 <sup>-6</sup>  | 6.34x10 <sup>-4</sup>  | ACSM5           | intergenic  | -                  | -       | cis             |
| I2       | 3   | M1GA0004189 | 26724456      | 0.40 | 0.60 | 3.53x10 <sup>-5</sup>  | 8.24x10 <sup>-3</sup>  | ACSM5           | intergenic  | -                  | -       | cis             |
| I2       | 3   | MARC0001269 | 26822485      | 0.72 | 0.28 | 1.11x10 <sup>-17</sup> | 1.57x10 <sup>-14</sup> | ACSM5           | intergenic  | -                  | -       | cis             |
| I2       | 3   | ALGA0106209 | 26913735      | 0.43 | 0.57 | 3.16x10 <sup>-8</sup>  | 1.61x10 <sup>-5</sup>  | ACSM5           | intronic    | ENSSSCG00000029212 | GDE1    | cis             |
| I2       | 3   | ALGA0121590 | 26978899      | 0.52 | 0.48 | 2.66x10 <sup>-15</sup> | 2.83x10 <sup>-12</sup> | ACSM5           | intronic    | ENSSSCG00000007866 | TMC7    | cis             |
| I2       | 3   | ASGA0090088 | 27058670      | 0.77 | 0.23 | 1.11x10 <sup>-17</sup> | 1.57x10 <sup>-14</sup> | ACSM5           | intronic    | ENSSSCG00000007868 | TMC5    | cis             |
| I2       | 3   | MARC0094635 | 27083041      | 0.47 | 0.53 | 1.13x10 <sup>-6</sup>  | 4.12x10 <sup>-4</sup>  | ACSM5           | intergenic  | -                  | -       | cis             |
| I2       | 3   | ASGA0105223 | 27200658      | 0.77 | 0.23 | 1.11x10 <sup>-17</sup> | 1.57x10 <sup>-14</sup> | ACSM5           | intronic    | ENSSSCG00000022200 | -       | cis             |
| I2       | 3   | ALGA0124353 | 27208947      | 0.53 | 0.47 | 9.98x10 <sup>-6</sup>  | 2.75x10 <sup>-3</sup>  | ACSM5           | intronic    | ENSSSCG00000022200 | -       | cis             |
| I2       | 3   | SIRI0001454 | 27254477      | 0.77 | 0.23 | 1.11x10 <sup>-17</sup> | 1.57x10 <sup>-14</sup> | ACSM5           | intronic    | ENSSSCG00000022200 | -       | cis             |
| I2       | 3   | MARC0010219 | 27473051      | 0.44 | 0.56 | 1.56x10 <sup>-6</sup>  | 5.48x10 <sup>-4</sup>  | ACSM5           | intergenic  | -                  | -       | cis             |
| I2       | 3   | ASGA0090426 | 27551099      | 0.56 | 0.44 | 2.20x10 <sup>-8</sup>  | 1.17x10 <sup>-5</sup>  | ACSM5           | intergenic  | -                  | -       | cis             |
| I2       | 3   | ALGA0018136 | 27799603      | 0.47 | 0.53 | 4.95x10 <sup>-6</sup>  | 1.42x10 <sup>-3</sup>  | ACSM5           | intronic    | ENSSSCG00000007872 | -       | cis             |
| I2       | 3   | ALGA0018138 | 27839633      | 0.71 | 0.29 | 1.11x10 <sup>-17</sup> | 1.57x10 <sup>-14</sup> | ACSM5           | intronic    | ENSSSCG00000007872 | -       | cis             |
| I2       | 3   | MARC0000263 | 27855477      | 0.59 | 0.41 | 3.32x10 <sup>-7</sup>  | 1.32x10 <sup>-4</sup>  | ACSM5           | intronic    | ENSSSCG00000007872 | -       | cis             |
| I2       | 3   | MARC0046257 | 27878993      | 0.79 | 0.21 | 1.11x10 <sup>-17</sup> | 1.57x10 <sup>-14</sup> | ACSM5           | intronic    | ENSSSCG00000007872 | -       | cis             |
| I2       | 3   | ALGA0018155 | 27912117      | 0.66 | 0.34 | 1.37x10 <sup>-7</sup>  | 6.10x10 <sup>-5</sup>  | ACSM5           | upstream    | ENSSSCG00000007872 | -       | cis             |
| I2       | 3   | ALGA0018160 | 27925965      | 0.66 | 0.34 | 2.36x10 <sup>-7</sup>  | 9.92x10 <sup>-5</sup>  | ACSM5           | intergenic  | -                  | -       | cis             |
| I2       | 3   | ASGA0013982 | 27941321      | 0.71 | 0.29 | 1.11x10 <sup>-17</sup> | 1.57x10 <sup>-14</sup> | ACSM5           | intergenic  | -                  | -       | cis             |
| I2       | 3   | ASGA0013988 | 27988181      | 0.65 | 0.35 | 1.01x10 <sup>-5</sup>  | 2.76x10 <sup>-3</sup>  | ACSM5           | intergenic  | -                  | -       | cis             |

| Interval | Chr | SNP         | Position (bp) | fA1  | fA2  | p-value                | q-value               | Associated Gene | Consequence | Ensembl_Geneld     | Gene Id | Cis/Trans-eSNPs |
|----------|-----|-------------|---------------|------|------|------------------------|-----------------------|-----------------|-------------|--------------------|---------|-----------------|
| I2       | 3   | ALGA0018199 | 28346892      | 0.66 | 0.34 | 9.35x10 <sup>-7</sup>  | 3.47x10 <sup>-4</sup> | ACSM5           | intergenic  | -                  | -       | cis             |
| I2       | 3   | ASGA0014014 | 28373428      | 0.65 | 0.35 | 2.85x10 <sup>-7</sup>  | 1.17x10 <sup>-4</sup> | ACSM5           | upstream    | ENSSSCG00000019735 | 5S_rRNA | cis             |
| I2       | 3   | ASGA0014023 | 28786813      | 0.67 | 0.33 | 2.59x10 <sup>-6</sup>  | 8.47x10 <sup>-4</sup> | ACSM5           | intergenic  | -                  | -       | cis             |
| I2       | 3   | ASGA0104499 | 28886788      | 0.54 | 0.46 | 4.94x10 <sup>-7</sup>  | 1.93x10 <sup>-4</sup> | ACSM5           | downstream  | ENSSSCG00000019945 | U6      | cis             |
| I2       | 3   | ASGA0014039 | 29752690      | 0.61 | 0.39 | 2.89x10 <sup>-5</sup>  | 7.18x10 <sup>-3</sup> | ACSM5           | intronic    | ENSSSCG00000007878 | PARN    | cis             |
| I2       | 3   | H3GA0009179 | 30781487      | 0.63 | 0.37 | 4.30x10 <sup>-6</sup>  | 1.27x10 <sup>-3</sup> | ACSM5           | intergenic  | -                  | -       | cis             |
| I2       | 3   | CASI0006297 | 32293788      | 0.54 | 0.46 | 2.90x10 <sup>-7</sup>  | 1.18x10 <sup>-4</sup> | ACSM5           | intergenic  | -                  | -       | trans           |
| I2       | 3   | M1GA0024387 | 32474314      | 0.55 | 0.45 | 6.00x10 <sup>-8</sup>  | 2.83x10 <sup>-5</sup> | ACSM5           | intergenic  | -                  | -       | trans           |
| I2       | 3   | ALGA0119050 | 32501522      | 0.55 | 0.45 | 6.00x10 <sup>-8</sup>  | 2.83x10 <sup>-5</sup> | ACSM5           | intergenic  | -                  | -       | trans           |
| I2       | 3   | MARC0015229 | 32509563      | 0.55 | 0.45 | 6.00x10 <sup>-8</sup>  | 2.83x10 <sup>-5</sup> | ACSM5           | upstream    | ENSSSCG00000007899 | -       | trans           |
| I2       | 3   | MARC0031378 | 32543630      | 0.55 | 0.45 | 1.63x10 <sup>-7</sup>  | 7.09x10 <sup>-5</sup> | ACSM5           | intergenic  | -                  | -       | trans           |
| I2       | 3   | MARC0004212 | 34672106      | 0.44 | 0.56 | 1.18x10 <sup>-10</sup> | 8.93x10 <sup>-8</sup> | ACSM5           | synonymous  | ENSSSCG00000007909 | ABAT    | trans           |
| I2       | 3   | M1GA0004280 | 34875865      | 0.62 | 0.38 | 1.60x10 <sup>-6</sup>  | 5.52x10 <sup>-4</sup> | ACSM5           | intergenic  | -                  | -       | trans           |
| I2       | 3   | ASGA0014213 | 34921528      | 0.50 | 0.50 | 1.39x10 <sup>-8</sup>  | 7.71x10 <sup>-6</sup> | ACSM5           | intronic    | ENSSSCG00000007914 | -       | trans           |
| I2       | 3   | ALGA0115191 | 34936811      | 0.30 | 0.70 | 1.16x10 <sup>-5</sup>  | 3.13x10 <sup>-3</sup> | ACSM5           | intronic    | ENSSSCG00000007914 | -       | trans           |
| I2       | 3   | ALGA0107071 | 35759334      | 0.69 | 0.31 | 1.06x10 <sup>-11</sup> | 9.22x10 <sup>-9</sup> | ACSM5           | intergenic  | -                  | -       | trans           |
| I2       | 3   | ALGA0102473 | 37034994      | 0.76 | 0.24 | 8.97x10 <sup>-8</sup>  | 4.14x10 <sup>-5</sup> | ACSM5           | intergenic  | -                  | -       | trans           |
| I2       | 3   | MARC0020793 | 37234505      | 0.77 | 0.23 | 5.05x10 <sup>-7</sup>  | 1.95x10 <sup>-4</sup> | ACSM5           | intergenic  | -                  | -       | trans           |
| I2       | 3   | ASGA0105173 | 39375927      | 0.37 | 0.63 | 1.52x10 <sup>-5</sup>  | 3.93x10 <sup>-3</sup> | ACSM5           | intergenic  | -                  | -       | trans           |
| I2       | 3   | ALGA0105074 | 39433703      | 0.37 | 0.63 | 1.52x10 <sup>-5</sup>  | 3.93x10 <sup>-3</sup> | ACSM5           | intergenic  | -                  | -       | trans           |
| I2       | 3   | ALGA0114510 | 39644923      | 0.37 | 0.63 | 1.52x10 <sup>-5</sup>  | 3.93x10 <sup>-3</sup> | ACSM5           | intronic    | ENSSSCG00000007951 | CREBBP  | trans           |
| I2       | 3   | H3GA0009309 | 39858459      | 0.37 | 0.63 | 1.52x10 <sup>-5</sup>  | 3.93x10 <sup>-3</sup> | ACSM5           | downstream  | ENSSSCG00000007953 | DNASE1  | trans           |
| I2       | 3   | ALGA0018568 | 39881683      | 0.53 | 0.47 | 6.11x10 <sup>-6</sup>  | 1.73x10 <sup>-3</sup> | ACSM5           | intergenic  | -                  | -       | trans           |
| I2       | 3   | M1GA0004302 | 39992614      | 0.53 | 0.47 | 6.11x10 <sup>-6</sup>  | 1.73x10 <sup>-3</sup> | ACSM5           | downstream  | ENSSSCG00000007954 | SLX4    | trans           |
| I2       | 3   | ASGA0093403 | 46893143      | 0.75 | 0.25 | 7.25x10 <sup>-11</sup> | 5.66x10 <sup>-8</sup> | ACSM5           | intergenic  | -                  | -       | trans           |

| Interval | Chr | SNP         | Position (bp) | fA1  | fA2  | p-value                | q-value               | Associated Gene | Consequence         | Ensembl_Geneld     | Gene Id | Cis/Trans-eSNPs |
|----------|-----|-------------|---------------|------|------|------------------------|-----------------------|-----------------|---------------------|--------------------|---------|-----------------|
| I2       | 3   | H3GA0009347 | 47890224      | 0.53 | 0.47 | 3.38x10 <sup>-10</sup> | 2.35x10 <sup>-7</sup> | ACSM5           | intergenic          | -                  | -       | trans           |
| I2       | 3   | ALGA0018674 | 47957752      | 0.69 | 0.31 | 1.63x10 <sup>-6</sup>  | 5.52x10 <sup>-4</sup> | ACSM5           | intronic            | ENSSSCG00000008111 | NPHP1   | trans           |
| I2       | 3   | ALGA0018683 | 47979489      | 0.69 | 0.31 | 1.63x10 <sup>-6</sup>  | 5.52x10 <sup>-4</sup> | ACSM5           | intronic            | ENSSSCG00000008111 | NPHP1   | trans           |
| I2       | 3   | H3GA0009368 | 48216866      | 0.81 | 0.19 | 3.26x10 <sup>-5</sup>  | 7.75x10 <sup>-3</sup> | ACSM5           | intergenic          | -                  | -       | trans           |
| I2       | 3   | MARC0071874 | 48324056      | 0.86 | 0.14 | 5.07x10 <sup>-9</sup>  | 2.90x10 <sup>-6</sup> | ACSM5           | intergenic          | -                  | -       | trans           |
| I2       | 3   | MARC0041994 | 48345565      | 0.86 | 0.14 | 2.00x10 <sup>-9</sup>  | 1.23x10 <sup>-6</sup> | ACSM5           | downstream          | ENSSSCG00000022826 | -       | trans           |
| I2       | 3   | ALGA0018791 | 48500096      | 0.77 | 0.23 | 3.02x10 <sup>-10</sup> | 2.14x10 <sup>-7</sup> | ACSM5           | upstream            | ENSSSCG00000008121 | GPAT2   | trans           |
| I2       | 3   | ALGA0114161 | 48855083      | 0.81 | 0.19 | 3.26x10 <sup>-5</sup>  | 7.75x10 <sup>-3</sup> | ACSM5           | intronic            | ENSSSCG00000008123 | ARID5A  | trans           |
| I2       | 3   | ASGA0104566 | 48856852      | 0.81 | 0.19 | 3.26x10 <sup>-5</sup>  | 7.75x10 <sup>-3</sup> | ACSM5           | intronic            | ENSSSCG00000008123 | ARID5A  | trans           |
| I2       | 3   | ALGA0018800 | 49041576      | 0.81 | 0.19 | 3.26x10 <sup>-5</sup>  | 7.75x10 <sup>-3</sup> | ACSM5           | intronic            | ENSSSCG00000008127 | -       | trans           |
| I2       | 3   | ASGA0014426 | 49104674      | 0.81 | 0.19 | 3.26x10 <sup>-5</sup>  | 7.75x10 <sup>-3</sup> | ACSM5           | downstream          | ENSSSCG00000008129 | -       | trans           |
| I2       | 3   | ASGA0103041 | 49443426      | 0.86 | 0.14 | 2.00x10 <sup>-9</sup>  | 1.23x10 <sup>-6</sup> | ACSM5           | intergenic          | -                  | -       | trans           |
| I2       | 3   | ASGA0090160 | 49528314      | 0.86 | 0.14 | 2.00x10 <sup>-9</sup>  | 1.23x10 <sup>-6</sup> | ACSM5           | intergenic          | -                  | -       | trans           |
| I2       | 3   | ALGA0018859 | 49555848      | 0.78 | 0.22 | 1.80x10 <sup>-7</sup>  | 7.74x10 <sup>-5</sup> | ACSM5           | intergenic          | -                  | -       | trans           |
| I2       | 3   | H3GA0009485 | 50180162      | 0.85 | 0.15 | 6.17x10 <sup>-7</sup>  | 2.36x10 <sup>-4</sup> | ACSM5           | intronic            | ENSSSCG00000008140 | SLC5A7  | trans           |
| I2       | 3   | MARC0024281 | 50793814      | 0.43 | 0.57 | 4.60x10 <sup>-6</sup>  | 1.33x10 <sup>-3</sup> | ACSM5           | intergenic          | -                  | -       | trans           |
| I2       | 3   | ASGA0014649 | 56289772      | 0.65 | 0.35 | 2.41x10 <sup>-5</sup>  | 6.19x10 <sup>-3</sup> | ACSM5           | intergenic          | -                  | -       | trans           |
| I2       | 3   | M1GA0004378 | 56459296      | 0.62 | 0.38 | 1.97x10 <sup>-10</sup> | 1.42x10 <sup>-7</sup> | ACSM5           | intronic            | ENSSSCG00000008175 | CHST10  | trans           |
| I2       | 3   | M1GA0004379 | 56484282      | 0.73 | 0.27 | 2.29x10 <sup>-6</sup>  | 7.55x10 <sup>-4</sup> | ACSM5           | 3_prime_UTR_variant | ENSSSCG00000008175 | CHST10  | trans           |
| I2       | 3   | INRA0010621 | 56668305      | 0.86 | 0.14 | 3.41x10 <sup>-6</sup>  | 1.07x10 <sup>-3</sup> | ACSM5           | intergenic          | -                  | -       | trans           |
| I2       | 3   | DRGA0003897 | 56709945      | 0.86 | 0.14 | 3.41x10 <sup>-6</sup>  | 1.07x10 <sup>-3</sup> | ACSM5           | intergenic          | -                  | -       | trans           |
| I2       | 3   | ALGA0019110 | 56746317      | 0.86 | 0.14 | 3.41x10 <sup>-6</sup>  | 1.07x10 <sup>-3</sup> | ACSM5           | intergenic          | -                  | -       | trans           |
| I2       | 3   | ASGA0014688 | 56833842      | 0.67 | 0.33 | 4.03x10 <sup>-9</sup>  | 2.34x10 <sup>-6</sup> | ACSM5           | intronic            | ENSSSCG00000008177 | AFF3    | trans           |
| I2       | 3   | ASGA0014690 | 56857721      | 0.73 | 0.27 | 4.09x10 <sup>-6</sup>  | 1.22x10 <sup>-3</sup> | ACSM5           | intronic            | ENSSSCG00000008177 | AFF3    | trans           |
| I2       | 3   | ALGA0019116 | 56885984      | 0.86 | 0.14 | 3.41x10 <sup>-6</sup>  | 1.07x10 <sup>-3</sup> | ACSM5           | intronic            | ENSSSCG00000008177 | AFF3    | trans           |

| Interval | Chr | SNP         | Position (bp) | fA1  | fA2  | p-value                | q-value                | Associated Gene | Consequence | Ensembl_Geneld     | Gene Id | Cis/Trans-eSNPs |
|----------|-----|-------------|---------------|------|------|------------------------|------------------------|-----------------|-------------|--------------------|---------|-----------------|
| I2       | 3   | ALGA0019121 | 57129085      | 0.73 | 0.27 | 4.09x10 <sup>-6</sup>  | 1.22x10 <sup>-3</sup>  | ACSM5           | intronic    | ENSSSCG00000008177 | AFF3    | trans           |
| I2       | 3   | ALGA0108239 | 57170110      | 0.73 | 0.27 | 4.09x10 <sup>-6</sup>  | 1.22x10 <sup>-3</sup>  | ACSM5           | intronic    | ENSSSCG00000008177 | AFF3    | trans           |
| I2       | 3   | MARC0001937 | 57187517      | 0.54 | 0.46 | 1.25x10 <sup>-9</sup>  | 8.25x10 <sup>-7</sup>  | ACSM5           | intronic    | ENSSSCG00000008177 | AFF3    | trans           |
| I2       | 3   | MARC0034058 | 57211150      | 0.40 | 0.60 | 2.27x10 <sup>-9</sup>  | 1.38x10 <sup>-6</sup>  | ACSM5           | intergenic  | -                  | -       | trans           |
| I2       | 3   | ASGA0094631 | 57219021      | 0.56 | 0.44 | 1.06x10 <sup>-6</sup>  | 3.90x10 <sup>-4</sup>  | ACSM5           | intergenic  | -                  | -       | trans           |
| I2       | 3   | ALGA0019125 | 57431333      | 0.73 | 0.27 | 4.09x10 <sup>-6</sup>  | 1.22x10 <sup>-3</sup>  | ACSM5           | intronic    | ENSSSCG00000008179 | REV1    | trans           |
| I2       | 3   | ASGA0082387 | 57704441      | 0.73 | 0.27 | 4.09x10 <sup>-6</sup>  | 1.22x10 <sup>-3</sup>  | ACSM5           | downstream  | ENSSSCG00000008185 | MITD1   | trans           |
| I2       | 3   | ASGA0014810 | 60580301      | 0.18 | 0.82 | 3.14x10 <sup>-5</sup>  | 7.75x10 <sup>-3</sup>  | ACSM5           | upstream    | ENSSSCG00000008213 | CD8B    | trans           |
| I2       | 3   | MARC0017871 | 60850148      | 0.81 | 0.19 | 3.97x10 <sup>-5</sup>  | 9.10x10 <sup>-3</sup>  | ACSM5           | downstream  | ENSSSCG00000008217 | CD8A    | trans           |
| I2       | 3   | ASGA0014871 | 62719672      | 0.21 | 0.79 | 3.86x10 <sup>-5</sup>  | 8.90x10 <sup>-3</sup>  | ACSM5           | intergenic  | -                  | -       | trans           |
| I2       | 3   | ALGA0111911 | 63248078      | 0.19 | 0.81 | 3.42x10 <sup>-5</sup>  | 8.03x10 <sup>-3</sup>  | ACSM5           | intergenic  | -                  | -       | trans           |
| I3       | 3   | MARC0032158 | 83365626      | 0.35 | 0.65 | 1.63x10 <sup>-6</sup>  | 5.52x10 <sup>-4</sup>  | ACSM5           | intergenic  | -                  | -       | trans           |
| I4       | 3   | ALGA0020206 | 100905327     | 0.70 | 0.30 | 9.34x10 <sup>-6</sup>  | 2.59x10 <sup>-3</sup>  | ACSM5           | intergenic  | -                  | -       | trans           |
| I4       | 3   | ASGA0015465 | 101222209     | 0.68 | 0.32 | 1.41x10 <sup>-6</sup>  | 5.09x10 <sup>-4</sup>  | ACSM5           | intergenic  | -                  | -       | trans           |
| I4       | 3   | ASGA0098441 | 101461883     | 0.70 | 0.30 | 7.63x10 <sup>-6</sup>  | 2.15x10 <sup>-3</sup>  | ACSM5           | intergenic  | -                  | -       | trans           |
| I5       | 10  | H3GA0055101 | 54839         | 0.47 | 0.53 | 8.11x10 <sup>-7</sup>  | 3.04x10 <sup>-4</sup>  | ACSM5           | intronic    | ENSSSCG00000010795 | NDUFAB1 | trans           |
| I5       | 10  | MARC0015344 | 65922         | 0.47 | 0.53 | 8.11x10 <sup>-7</sup>  | 3.04x10 <sup>-4</sup>  | ACSM5           | downstream  | ENSSSCG00000010795 | NDUFAB1 | trans           |
| I5       | 10  | ASGA0082591 | 120016        | 0.74 | 0.26 | 2.00x10 <sup>-8</sup>  | 1.08x10 <sup>-5</sup>  | ACSM5           | downstream  | ENSSSCG00000010797 | EARS2   | trans           |
| I5       | 10  | ASGA0092761 | 150115        | 0.65 | 0.35 | 2.78x10 <sup>-9</sup>  | 1.66x10 <sup>-6</sup>  | ACSM5           | intronic    | ENSSSCG00000010798 | GGA2    | trans           |
| I5       | 10  | H3GA0055120 | 167126        | 0.70 | 0.30 | 2.89x10 <sup>-15</sup> | 2.99x10 <sup>-12</sup> | ACSM5           | downstream  | ENSSSCG00000010798 | GGA2    | trans           |
| I5       | 10  | ASGA0090778 | 175359        | 0.76 | 0.24 | 1.44x10 <sup>-15</sup> | 1.72x10 <sup>-12</sup> | ACSM5           | intronic    | ENSSSCG00000010799 | COG7    | trans           |
| I5       | 10  | ASGA0094144 | 184863        | 0.71 | 0.29 | 1.09x10 <sup>-8</sup>  | 6.13x10 <sup>-6</sup>  | ACSM5           | intronic    | ENSSSCG00000010799 | COG7    | trans           |
| I5       | 10  | ASGA0095156 | 202837        | 0.74 | 0.26 | 2.00x10 <sup>-8</sup>  | 1.08x10 <sup>-5</sup>  | ACSM5           | intronic    | ENSSSCG00000010799 | COG7    | trans           |
| I6       | 16  | ALGA0089402 | 19133382      | 0.66 | 0.34 | 3.83x10 <sup>-5</sup>  | 8.88x10 <sup>-3</sup>  | ACSM5           | intronic    | ENSSSCG00000016810 | PDZD2   | trans           |
| I7       | 13  | ASGA0055780 | 6891435       | 0.55 | 0.45 | 1.20x10 <sup>-7</sup>  | 4.74x10 <sup>-3</sup>  | ELOVL6          | intergenic  | -                  | -       | trans           |

| Interval | Chr | SNP         | Position (bp) | fA1  | fA2  | p-value               | q-value               | Associated Gene | Consequence         | Ensembl_Geneld     | Gene Id | Cis/Trans-eSNPs |
|----------|-----|-------------|---------------|------|------|-----------------------|-----------------------|-----------------|---------------------|--------------------|---------|-----------------|
| I8       | 2   | ASGA0008719 | 6094116       | 0.48 | 0.52 | 1.26x10 <sup>-5</sup> | 4.75x10 <sup>-2</sup> | FABP4           | intergenic          | -                  | -       | trans           |
| I8       | 2   | MARC0018949 | 8997005       | 0.59 | 0.41 | 1.38x10 <sup>-5</sup> | 4.75x10 <sup>-2</sup> | FABP4           | upstream            | ENSSSCG00000023090 | BEST1   | trans           |
| I9       | 3   | ASGA0015643 | 109404009     | 0.69 | 0.31 | 1.44x10 <sup>-5</sup> | 4.75x10 <sup>-2</sup> | FABP4           | 3_prime_UTR_variant | ENSSSCG00000020689 | CEBPZOS | trans           |
| I9       | 3   | ALGA0020658 | 113469226     | 0.91 | 0.09 | 6.70x10 <sup>-6</sup> | 4.75x10 <sup>-2</sup> | FABP4           | intronic            | ENSSSCG00000008510 | LTBP1   | trans           |
| I9       | 3   | ASGA0016181 | 119739502     | 0.66 | 0.34 | 8.31x10 <sup>-6</sup> | 4.75x10 <sup>-2</sup> | FABP4           | synonymous          | ENSSSCG00000008568 | DRC1    | trans           |
| I10      | 4   | ALGA0024527 | 36727180      | 0.57 | 0.43 | 1.11x10 <sup>-5</sup> | 4.75x10 <sup>-2</sup> | FABP4           | intergenic          | -                  | -       | trans           |
| I11      | 4   | ALGA0025158 | 60566866      | 0.48 | 0.52 | 1.93x10 <sup>-6</sup> | 1.95x10 <sup>-2</sup> | FABP4           | intergenic          | -                  | -       | cis (FABP5)     |
| I11      | 4   | ALGA0025162 | 60844160      | 0.68 | 0.32 | 1.32x10 <sup>-5</sup> | 4.75x10 <sup>-2</sup> | FABP4           | intergenic          | -                  | -       | cis (FABP5)     |
| I11      | 4   | MARC0115316 | 61059205      | 0.52 | 0.48 | 1.97x10 <sup>-6</sup> | 1.95x10 <sup>-2</sup> | FABP4           | intronic            | ENSSSCG00000022989 | ZNF704  | cis (FABP5)     |
| I11      | 4   | INRA0014244 | 63090979      | 0.59 | 0.41 | 1.19x10 <sup>-5</sup> | 4.75x10 <sup>-2</sup> | FABP4           | intronic            | ENSSSCG00000006163 | PKIA    | cis (FABP5)     |
| I11      | 4   | ALGA0025337 | 65252780      | 0.77 | 0.23 | 8.67x10 <sup>-7</sup> | 1.95x10 <sup>-2</sup> | FABP4           | intergenic          | -                  | -       | cis (FABP5)     |
| I12      | 9   | ALGA0054847 | 129178729     | 0.88 | 0.12 | 1.19x10 <sup>-6</sup> | 1.95x10 <sup>-2</sup> | FABP4           | intronic            | ENSSSCG00000015508 | TNR     | trans           |
| I13      | 2   | ASGA0008845 | 7850065       | 0.61 | 0.39 | 9.88x10 <sup>-6</sup> | 3.93x10 <sup>-2</sup> | FADS2           | intronic            | ENSSSCG00000013056 | LGALS12 | trans           |
| I13      | 2   | ASGA0104083 | 8867970       | 0.78 | 0.22 | 5.98x10 <sup>-8</sup> | 5.94x10 <sup>-4</sup> | FADS2           | intronic            | ENSSSCG00000013066 | -       | cis             |
| I13      | 2   | ASGA0090054 | 8943379       | 0.86 | 0.14 | 2.03x10 <sup>-6</sup> | 1.15x10 <sup>-2</sup> | FADS2           | intergenic          | -                  | -       | cis             |
| I13      | 2   | ALGA0011764 | 9098547       | 0.89 | 0.11 | 1.54x10 <sup>-5</sup> | 4.71x10 <sup>-2</sup> | FADS2           | intergenic          | -                  | -       | cis             |
| I13      | 2   | ASGA0008884 | 9139348       | 0.92 | 0.08 | 1.54x10 <sup>-5</sup> | 4.71x10 <sup>-2</sup> | FADS2           | intronic            | ENSSSCG00000013072 | FADS2   | cis             |
| I13      | 2   | ASGA0008896 | 9171685       | 0.66 | 0.34 | 2.58x10 <sup>-7</sup> | 1.71x10 <sup>-3</sup> | FADS2           | intronic            | ENSSSCG00000013073 | FADS3   | cis             |
| I13      | 2   | ALGA0011760 | 9198141       | 0.86 | 0.14 | 1.21x10 <sup>-5</sup> | 4.37x10 <sup>-2</sup> | FADS2           | upstream            | ENSSSCG00000013074 | RAB3IL1 | cis             |
| I13      | 2   | ASGA0008874 | 9218889       | 0.79 | 0.21 | 2.28x10 <sup>-7</sup> | 1.71x10 <sup>-3</sup> | FADS2           | intergenic          | -                  | -       | cis             |
| I14      | 6   | ALGA0035721 | 74418977      | 0.74 | 0.26 | 7.50x10 <sup>-6</sup> | 3.31x10 <sup>-2</sup> | FADS2           | intergenic          | -                  | -       | trans           |
| I15      | 8   | ASGA0100508 | 59002816      | 0.35 | 0.65 | 1.93x10 <sup>-5</sup> | 4.80x10 <sup>-2</sup> | FADS2           | intronic            | ENSSSCG00000025792 | -       | trans           |
| I15      | 8   | MARC0041089 | 59080961      | 0.65 | 0.35 | 1.93x10 <sup>-5</sup> | 4.80x10 <sup>-2</sup> | FADS2           | intronic            | ENSSSCG00000008913 | IGFBP7  | trans           |
| I15      | 8   | H3GA0024926 | 68676342      | 0.65 | 0.35 | 1.93x10 <sup>-5</sup> | 4.80x10 <sup>-2</sup> | FADS2           | intergenic          | -                  | -       | trans           |
| I16      | 10  | H3GA0030086 | 46933533      | 0.66 | 0.34 | 2.40x10 <sup>-6</sup> | 1.19x10 <sup>-2</sup> | FADS2           | intergenic          | -                  | -       | trans           |

| Interval | Chr | SNP         | Position (bp) | fA1  | fA2  | p-value               | q-value               | Associated Gene | Consequence | Ensembl_Geneld     | Gene Id | Cis/Trans-eSNPs |
|----------|-----|-------------|---------------|------|------|-----------------------|-----------------------|-----------------|-------------|--------------------|---------|-----------------|
| I17      | 9   | MARC0034587 | 20183865      | 0.76 | 0.24 | 2.15x10 <sup>-5</sup> | 3.42x10 <sup>-2</sup> | SLC27A4         | intergenic  | -                  | -       | trans           |
| I17      | 9   | ASGA0041925 | 20196539      | 0.79 | 0.21 | 1.69x10 <sup>-5</sup> | 2.92x10 <sup>-2</sup> | SLC27A4         | intergenic  | -                  | -       | trans           |
| I18      | 14  | ASGA0064787 | 88898693      | 0.95 | 0.05 | 2.51x10 <sup>-6</sup> | 4.76x10 <sup>-3</sup> | SLC27A4         | intergenic  | -                  | -       | trans           |
| I18      | 14  | MARC0057510 | 89058255      | 0.95 | 0.05 | 2.51x10 <sup>-6</sup> | 4.76x10 <sup>-3</sup> | SLC27A4         | intronic    | ENSSSCG00000010342 | SH2D4B  | trans           |
| I18      | 14  | MARC0029597 | 89073094      | 0.95 | 0.05 | 2.51x10 <sup>-6</sup> | 4.76x10 <sup>-3</sup> | SLC27A4         | downstream  | ENSSSCG00000010342 | SH2D4B  | trans           |
| I18      | 14  | ALGA0079330 | 89521045      | 0.95 | 0.05 | 2.51x10 <sup>-6</sup> | 4.76x10 <sup>-3</sup> | SLC27A4         | intergenic  | -                  | -       | trans           |
| I18      | 14  | MARC0041088 | 90286262      | 0.95 | 0.05 | 2.51x10 <sup>-6</sup> | 4.76x10 <sup>-3</sup> | SLC27A4         | intergenic  | -                  | -       | trans           |
| I18      | 14  | ASGA0064841 | 90338701      | 0.95 | 0.05 | 2.51x10 <sup>-6</sup> | 4.76x10 <sup>-3</sup> | SLC27A4         | intergenic  | -                  | -       | trans           |
| I18      | 14  | ASGA0064844 | 90362764      | 0.95 | 0.05 | 2.51x10 <sup>-6</sup> | 4.76x10 <sup>-3</sup> | SLC27A4         | intergenic  | -                  | -       | trans           |
| I18      | 14  | MARC0088303 | 90797721      | 0.95 | 0.05 | 2.51x10 <sup>-6</sup> | 4.76x10 <sup>-3</sup> | SLC27A4         | intergenic  | -                  | -       | trans           |
| I18      | 14  | ALGA0079375 | 90925232      | 0.95 | 0.05 | 2.51x10 <sup>-6</sup> | 4.76x10 <sup>-3</sup> | SLC27A4         | intergenic  | -                  | -       | trans           |
| I18      | 14  | MARC0010015 | 91126881      | 0.95 | 0.05 | 2.51x10 <sup>-6</sup> | 4.76x10 <sup>-3</sup> | SLC27A4         | intergenic  | -                  | -       | trans           |
| I18      | 14  | MARC0003938 | 91360798      | 0.91 | 0.09 | 6.84x10 <sup>-6</sup> | 1.24x10 <sup>-2</sup> | SLC27A4         | intergenic  | -                  | -       | trans           |
| I18      | 14  | ALGA0079393 | 91666877      | 0.95 | 0.05 | 2.51x10 <sup>-6</sup> | 4.76x10 <sup>-3</sup> | SLC27A4         | intergenic  | -                  | -       | trans           |
| I18      | 14  | MARC0056155 | 91685430      | 0.95 | 0.05 | 2.51x10 <sup>-6</sup> | 4.76x10 <sup>-3</sup> | SLC27A4         | intergenic  | -                  | -       | trans           |
| I18      | 14  | ALGA0079399 | 92014581      | 0.95 | 0.05 | 2.51x10 <sup>-6</sup> | 4.76x10 <sup>-3</sup> | SLC27A4         | intergenic  | -                  | -       | trans           |
| I18      | 14  | MARC0014799 | 92290727      | 0.95 | 0.05 | 2.51x10 <sup>-6</sup> | 4.76x10 <sup>-3</sup> | SLC27A4         | intronic    | ENSSSCG00000010350 | RGR     | trans           |
| I18      | 14  | ALGA0079407 | 92432834      | 0.95 | 0.05 | 2.51x10 <sup>-6</sup> | 4.76x10 <sup>-3</sup> | SLC27A4         | intronic    | ENSSSCG00000010351 | CCSER2  | trans           |
| I19      | 15  | ASGA0070790 | 137054337     | 0.93 | 0.07 | 3.39x10 <sup>-5</sup> | 5.00x10 <sup>-2</sup> | SLC27A4         | intergenic  | -                  | -       | trans           |
| I19      | 15  | MARC0050960 | 137365338     | 0.93 | 0.07 | 3.39x10 <sup>-5</sup> | 5.00x10 <sup>-2</sup> | SLC27A4         | intergenic  | -                  | -       | trans           |



**Table S3.** Transcription factor binding sites for *PPARG* in the *ACSM5* promoter region gene.

| <b>TF Name</b> | <b>Sequence</b>   | <b>Position*</b>        | <b>Strand</b> | <b>Score</b> | <b>P-value</b>        |
|----------------|-------------------|-------------------------|---------------|--------------|-----------------------|
| PPARG(M00512)  | TTTGGGGCCAGAGGTC  | 3:26,260,381-26,260,365 | +             | 10.16        | $2.50 \times 10^{-4}$ |
| PPARG(M00512)  | CTCAGCGTCAAAGGCAA | 3:26,260,939-26,260,922 | -             | 6.66         | $7.50 \times 10^{-4}$ |

\* Chromosomal position is given according to *Sscrofa10.2* assembly coordinates

**Table S4.** Transcription factor binding site for *SREBF1* in the *FADS2* promoter region gene.

| <b>TF Name</b> | <b>Sequence</b> | <b>Position*</b>      | <b>Strand</b> | <b>Score</b> | <b>P-value</b>        |
|----------------|-----------------|-----------------------|---------------|--------------|-----------------------|
| SREBF1(M00220) | CATCAGGTG       | 2:9,118,880-9,118,889 | +             | 9.23         | 5.50x10 <sup>-4</sup> |

\* Chromosomal position is given according to *Sscrofa10.2* assembly coordinates

**Table S6.** Mean comparison between males and females of backfat gene expression levels of 43 lipid-related genes.

| <b>Gene</b>     | <b>Mean in Male (SEM<sup>a</sup>)</b> | <b>Mean in Female (SEM<sup>a</sup>)</b> | <b>P-value</b>        |
|-----------------|---------------------------------------|-----------------------------------------|-----------------------|
| <i>ACSM5</i>    | 0.5182 (0.1303)                       | 1.7285 (0.2489)                         | 3.13x10 <sup>-4</sup> |
| <i>ADIPOQ</i>   | 0.9216 (0.0444)                       | 0.9828 (0.0290)                         | 2.36x10 <sup>-1</sup> |
| <i>AGPAT2</i>   | 0.8792 (0.0478)                       | 1.1046 (0.0467)                         | 1.37x10 <sup>-3</sup> |
| <i>ANK2</i>     | 0.8480 (0.0357)                       | 1.1495 (0.0379)                         | 2.29x10 <sup>-7</sup> |
| <i>ARNT</i>     | 1.0924 (0.0393)                       | 1.1204 (0.0227)                         | 5.19x10 <sup>-1</sup> |
| <i>CD36</i>     | 0.9962 (0.0380)                       | 0.9262 (0.0255)                         | 1.19x10 <sup>-1</sup> |
| <i>CPT1A</i>    | 0.9173 (0.0451)                       | 1.0113 (0.0372)                         | 1.12x10 <sup>-1</sup> |
| <i>CROT</i>     | 0.9526 (0.0487)                       | 1.0587 (0.0456)                         | 1.22x10 <sup>-1</sup> |
| <i>CYP2U1</i>   | 1.0761 (0.0621)                       | 1.1121 (0.0403)                         | 6.16x10 <sup>-1</sup> |
| <i>DGAT1</i>    | 1.0078 (0.0818)                       | 1.1463 (0.0575)                         | 1.60x10 <sup>-1</sup> |
| <i>DGAT2</i>    | 0.8239 (0.0852)                       | 1.2077 (0.1066)                         | 9.35x10 <sup>-3</sup> |
| <i>EGF</i>      | 0.6850 (0.0719)                       | 1.7432 (0.5234)                         | 8.85x10 <sup>-2</sup> |
| <i>ELOVL5</i>   | 0.9596 (0.0657)                       | 1.1672 (0.0642)                         | 2.98x10 <sup>-2</sup> |
| <i>ELOVL6</i>   | 0.7408 (0.0769)                       | 1.2435 (0.1106)                         | 7.89x10 <sup>-4</sup> |
| <i>ESRRA</i>    | 1.0523 (0.0441)                       | 1.1324 (0.0547)                         | 2.85x10 <sup>-1</sup> |
| <i>FABP4</i>    | 0.9172 (0.0298)                       | 0.9783 (0.0361)                         | 2.20x10 <sup>-1</sup> |
| <i>FABP5</i>    | 0.8709 (0.0395)                       | 0.8328 (0.0288)                         | 4.29x10 <sup>-1</sup> |
| <i>FADS1</i>    | 0.8151 (0.0421)                       | 0.8192 (0.0286)                         | 9.35x10 <sup>-1</sup> |
| <i>FADS2</i>    | 1.0317 (0.0630)                       | 0.8606 (0.0388)                         | 1.79x10 <sup>-2</sup> |
| <i>FADS3</i>    | 0.9534 (0.0321)                       | 0.9414 (0.0208)                         | 7.46x10 <sup>-1</sup> |
| <i>LIPC</i>     | 1.0681 (0.0678)                       | 1.0736 (0.0429)                         | 9.44x10 <sup>-1</sup> |
| <i>LPIN1</i>    | 0.9895 (0.0544)                       | 0.9046 (0.0408)                         | 2.09x10 <sup>-1</sup> |
| <i>MGLL</i>     | 0.9194 (0.0456)                       | 1.0508 (0.0376)                         | 2.84x10 <sup>-2</sup> |
| <i>MLXIPL</i>   | 0.9647 (0.0625)                       | 1.2457 (0.0582)                         | 1.65x10 <sup>-3</sup> |
| <i>NFKB1</i>    | 0.9855 (0.0256)                       | 0.8969 (0.0177)                         | 4.24x10 <sup>-3</sup> |
| <i>NR1H3</i>    | 1.0563 (0.0473)                       | 1.0664 (0.0333)                         | 8.59x10 <sup>-1</sup> |
| <i>PEX2</i>     | 0.8274 (0.0523)                       | 1.1094 (0.0437)                         | 7.24x10 <sup>-5</sup> |
| <i>PLA2G12A</i> | 0.8832 (0.0521)                       | 1.1725 (0.0484)                         | 1.19x10 <sup>-4</sup> |
| <i>PLCB2</i>    | 0.9450 (0.0411)                       | 0.9023 (0.0420)                         | 4.85x10 <sup>-1</sup> |
| <i>PLPP1</i>    | 1.0787 (0.0416)                       | 0.8176 (0.0311)                         | 1.47x10 <sup>-6</sup> |
| <i>PNPLA2</i>   | 0.9063 (0.0411)                       | 1.0913 (0.0365)                         | 1.21x10 <sup>-3</sup> |
| <i>POU2F1</i>   | 0.9196 (0.0249)                       | 0.9700 (0.0264)                         | 1.84x10 <sup>-1</sup> |
| <i>PPARA</i>    | 0.8984 (0.0652)                       | 1.2135 (0.0510)                         | 2.13x10 <sup>-4</sup> |
| <i>PPARD</i>    | 0.8802 (0.0451)                       | 1.2035 (0.0500)                         | 1.15x10 <sup>-5</sup> |
| <i>PPARG</i>    | 0.9723 (0.0460)                       | 1.0565 (0.0362)                         | 1.51x10 <sup>-1</sup> |
| <i>RBP4</i>     | 1.1959 (0.0784)                       | 1.2042 (0.0667)                         | 9.36x10 <sup>-1</sup> |
| <i>RXRG</i>     | 1.1373 (0.0804)                       | 1.1111 (0.0849)                         | 8.30x10 <sup>-1</sup> |
| <i>SCAP</i>     | 0.9765 (0.0389)                       | 1.1847 (0.0322)                         | 7.55x10 <sup>-5</sup> |
| <i>SCD</i>      | 0.4763 (0.6976)                       | 1.0685 (0.1701)                         | 7.40x10 <sup>-3</sup> |
| <i>SLC27A1</i>  | 1.1737 (0.0694)                       | 1.0792 (0.0504)                         | 2.65x10 <sup>-1</sup> |
| <i>SLC27A4</i>  | 1.1798 (0.0452)                       | 1.1247 (0.0314)                         | 3.09x10 <sup>-1</sup> |
| <i>SREBF1</i>   | 0.8074 (0.0516)                       | 1.2552 (0.0612)                         | 5.86x10 <sup>-7</sup> |
| <i>USF1</i>     | 1.0324 (0.0362)                       | 1.0333 (0.0191)                         | 9.82x10 <sup>-1</sup> |

<sup>a</sup>Standard error of the mean (SEM)

**Table S7.** Description of the 393 human orthologous genes.

| <b>Interval</b> | <b>Human associated gene name</b>                                                                                                                                                                                                                                                                                                                                                                                                                                                                                                                                                                                                                                                                                                                                                                                                                                                                                                                                                                                                                                                                                                                                                                                                                                             |
|-----------------|-------------------------------------------------------------------------------------------------------------------------------------------------------------------------------------------------------------------------------------------------------------------------------------------------------------------------------------------------------------------------------------------------------------------------------------------------------------------------------------------------------------------------------------------------------------------------------------------------------------------------------------------------------------------------------------------------------------------------------------------------------------------------------------------------------------------------------------------------------------------------------------------------------------------------------------------------------------------------------------------------------------------------------------------------------------------------------------------------------------------------------------------------------------------------------------------------------------------------------------------------------------------------------|
| I1              | <i>ALDH7A1, C5orf63, CTXN3, LMNB1, MARCH3, MEGF10, PHAX, PRRC1, TEX43, GRAMD3</i>                                                                                                                                                                                                                                                                                                                                                                                                                                                                                                                                                                                                                                                                                                                                                                                                                                                                                                                                                                                                                                                                                                                                                                                             |
| I2              | <i>ACSM5</i>                                                                                                                                                                                                                                                                                                                                                                                                                                                                                                                                                                                                                                                                                                                                                                                                                                                                                                                                                                                                                                                                                                                                                                                                                                                                  |
| I3              | <i>B3GNT2, CCT4, COMMD1, EHBP1, FAM161A, NUP54, OTX1, USP34, XPO1, MDH1</i>                                                                                                                                                                                                                                                                                                                                                                                                                                                                                                                                                                                                                                                                                                                                                                                                                                                                                                                                                                                                                                                                                                                                                                                                   |
| I4              | <i>ATP6V1E2, CAMKMT, EPAS1, PPM1B, PREPL, PRKCE, RHOQ, SIX2, SLC3A1, SRBD1, TMEM247, PIGF</i>                                                                                                                                                                                                                                                                                                                                                                                                                                                                                                                                                                                                                                                                                                                                                                                                                                                                                                                                                                                                                                                                                                                                                                                 |
| I5              | <i>COG7, EARS2, GGA2, NDUFAB1, PALB2, UBF1, DCTN</i>                                                                                                                                                                                                                                                                                                                                                                                                                                                                                                                                                                                                                                                                                                                                                                                                                                                                                                                                                                                                                                                                                                                                                                                                                          |
| I6              | <i>C5orf22, DROSHA, PDZD2, CDH6</i>                                                                                                                                                                                                                                                                                                                                                                                                                                                                                                                                                                                                                                                                                                                                                                                                                                                                                                                                                                                                                                                                                                                                                                                                                                           |
| I7              | <i>EFHB, KCNH8, SATB1</i>                                                                                                                                                                                                                                                                                                                                                                                                                                                                                                                                                                                                                                                                                                                                                                                                                                                                                                                                                                                                                                                                                                                                                                                                                                                     |
| I8              | <i>AHNAK, AP000721.4, AP5B1, ARL2, ASRGL1, ATG2A, ATL3, B3GAT3, B4GAT1, BAD, BANF1, BATF2, BEST1, BRMS1, BSCL2, C11orf68, C11orf84, C11orf95, C11orf98, CAPN1, CATSPER1, CCDC85B, CCDC88B, CD248, CDC42BPG, CDC42EP2, CDCA5, CFL1, CHRM1, CNIH2, CPSF7, CST6, CTSW, CYB561A3, DAGLA, DDB1, DNAJC4, DPF2, DRAP1, EEF1G, EFEMP2, EHD1, EIF1AD, EML3, ESRRA, FADS1, FADS2, FADS3, FAU, FEN1, FERMT3, FIBP, FKBP2, FLRT1, FOSL1, FRMD8, GAL3ST3, GANAB, GPHA2, GPR137, HNRNPUL2, HRASLS5, INCENP, INTS5, KAT5, KCNK4, KCNK7, KLC2, LGALS12, LRR10B, LTBP3, MACROD1, MAP4K2, MARK2, MEN1, METTL12, MRPL49, MTA2, MUS81, MYRF, NAA40, NAALADL1, NRXN2, NUDT22, NXF1, OTUB1, OVOL1, PACS1, PCNXL3, PGA4, PLA2G16, PLCB3, POLA2, POLR2G, PPP1R14B, PPP1R32, PPP2R5B, PRDX5, PYGM, RAB3IL1, RASGRP2, RCOR2, RELA, RIN1, RNASEH2C, ROM1, RPL13A, RPL22, RPS6KA4, RTN3, SAC3D1, SART1, SCGB1A1, SCGB1D2, SCYL1, SDHAF2, SF1, SF3B2, SIPA1, SLC22A10, SLC22A11, SLC22A12, SLC22A6, SLC22A8, SLC25A45, SLC3A2, SNX15, SNX32, SSSCA1, STIP1, STX5, SYT7, SYVN1, TAF6L, TEX40, TIGD3, TKFC, TM7SF2, TMEM138, TMEM151A, TMEM216, TMEM223, TMEM258, TMEM262, TRMT112, TRPT1, TSGA10IP, TTC9C, TUT1, UBXN1, UQCC3, VEGFB, VPS51, VWCE, WDR74, YIF1A, ZBTB3, ZFPL1, ZNHIT2, SCGB2A1, SLC29A2</i> |
| I9              | <i>ABHD1, ADGRF3, AGBL5, ALK, ASXL2, ATRAID, BIRC6, BRE, C2orf16, C2orf70, C2orf71, CAPN14, CCDC121, CDC42EP3, CEBPZ, CEBPZOS, CENPA, CGREF1, CIB4, CLIP4, CRIM1, DNMT3A, DPY30, DPYSL5, DRC1, DTNB, EHD3, EIF2B4, EMILIN1, EPT1, FAM179A, FAM98A, FEZ2, FNDC4, FOSL2, GAREM2, GCKR, GPATCH11, GPN1, HADHA, HADHB, HEATR5B, IFT172, KHK, KIF3C, KRTCAP3, LBH, LCLAT1, LTBP1, MAPRE3, MEMO1, NDUFAF7, NLRC4, NRBP1, PLB1, PPM1G, PPP1CB, PREB, PRKD3, PRR30, QPCT, RAB10, RASGRP3, RBKS, RMDN2, SLC30A6, SLC35F6, SLC4A1AP, SLC5A6, SNX17, SPAST, SPDYA, SRD5A2, STRN, SUPT7L, TCF23, TMEM214, TRMT61B, TTC27, VIT, WDR43, XDH, YPEL5, YWHAE, ZNF512, CYP1B1, GALNT14</i>                                                                                                                                                                                                                                                                                                                                                                                                                                                                                                                                                                                                      |
| I10             | <i>ATP6V1C1, AZIN1, BAALC, CTHRC1, DCAF13, FZD6, KLF10, ODF1, RRM2B, SLC25A32, UBR5, RIMS2</i>                                                                                                                                                                                                                                                                                                                                                                                                                                                                                                                                                                                                                                                                                                                                                                                                                                                                                                                                                                                                                                                                                                                                                                                |
| I11             | <i>FABP5</i>                                                                                                                                                                                                                                                                                                                                                                                                                                                                                                                                                                                                                                                                                                                                                                                                                                                                                                                                                                                                                                                                                                                                                                                                                                                                  |
| I12             | <i>CACYBP, GPR52, KIAA0040, MRPS14, PAPP2, RABGAP1L, RFWD2, TNN, TNFR, NXPE2</i>                                                                                                                                                                                                                                                                                                                                                                                                                                                                                                                                                                                                                                                                                                                                                                                                                                                                                                                                                                                                                                                                                                                                                                                              |
| I14             | <i>C1orf234, C1QA, C1QB, C1QC, CDC42, CNR2, ECE1, EPHA8, EPHB2, FUCA1, GALE, HMGCL, HSPG2, HTR1D, KDM1A, LACTBL1, LUZP1, ZBTB40</i>                                                                                                                                                                                                                                                                                                                                                                                                                                                                                                                                                                                                                                                                                                                                                                                                                                                                                                                                                                                                                                                                                                                                           |
| I15             | <i>ADGRL3, CENPC, CEP135, CLOCK, EPHA5, EXOC1, IGFBP7, NOA1, PDCL2, POLR2B, PPIC, REST, TECRL, TMEM165, TMSB4X</i>                                                                                                                                                                                                                                                                                                                                                                                                                                                                                                                                                                                                                                                                                                                                                                                                                                                                                                                                                                                                                                                                                                                                                            |
| I16             | <i>ARHGAP12, CUBN, EPC1, ERV3-1, KIF5B, PTCHD3, SVIL, ZEB1, ZNF438</i>                                                                                                                                                                                                                                                                                                                                                                                                                                                                                                                                                                                                                                                                                                                                                                                                                                                                                                                                                                                                                                                                                                                                                                                                        |
| I17             | <i>ANKRD42, CCDC90B, DLG2, PCF11, PRCP, RAB30</i>                                                                                                                                                                                                                                                                                                                                                                                                                                                                                                                                                                                                                                                                                                                                                                                                                                                                                                                                                                                                                                                                                                                                                                                                                             |
| I18             | <i>ANXA11, C10orf99, CCSER2, CDHR1, DYDC1, DYDC2, FAM213A, GHITM, GRID1, LRIT1, LRIT2, MAT1A, NRG3, PLAC9, PPIF, RGR, SFTPA1, SFTPD, SH2D4B, TMEM254, TSPAN14, ZMIZ1</i>                                                                                                                                                                                                                                                                                                                                                                                                                                                                                                                                                                                                                                                                                                                                                                                                                                                                                                                                                                                                                                                                                                      |
| I19             | <i>EPHA4, FAR5B, MOGAT1, PAX3, SGPP2</i>                                                                                                                                                                                                                                                                                                                                                                                                                                                                                                                                                                                                                                                                                                                                                                                                                                                                                                                                                                                                                                                                                                                                                                                                                                      |

**Table S8.** Top functional networks and molecules identified with IPA from the list of annotated genes mapping within the 19 eQTLs.

| ID | Interval | Top Diseases and Functions                                                                                     | Score | Focus Molecules | Molecules in Network                                                                                                                                                                                                                                                |
|----|----------|----------------------------------------------------------------------------------------------------------------|-------|-----------------|---------------------------------------------------------------------------------------------------------------------------------------------------------------------------------------------------------------------------------------------------------------------|
| 1  | I1       | Cell-To-Cell Signaling and Interaction, Hematological System Development and Function, Immune Cell Trafficking | 21    | 7               | ALDH4A1,ALDH7A1,ALDH8A1,APBB3,APP,ARHGAP24,C3orf62,C9orf78,CASC4,CCL26,CREBBP,CXCL12,DPY19L3,EVI2A,Fcr,FRMD8,GIMAP4,GIMAP5,GIMAP8,GPR85,GRAMD3,GRAMD1C,LMNB1,MARCH3,MEGF10,NMNAT2,Oas1b,PHAX,PRRC1,RGL1,RTP4,SYK,TMOD4,VAV1,ZCCHC12                                 |
| 2  | I3       | Carbohydrate Metabolism, Organ Morphology, Reproductive System Development and Function                        | 30    | 10              | B3GNT2,B3GNT7,B4GAT1,BRCA1,C16orf62,CCT4,COMMD1,DBR1,EHBP1,EXD2,FAM161A,FAM173A,FAM83A,GAREM1,Hd-neuronal intranuclear inclusions,HEATR5B,HTT,LSM14B,MAGEB18,MDH1,MFAP4,NTRK1,NUP54,OTX1,PLEKHA6,POU5F1,PRRT4,Ptpv,RWDD4,TP53,USP29,USP34,WDR91,XPO1,ZC3H7A         |
| 3  | I4       | Connective Tissue Disorders, Organismal Injury and Abnormalities, Cell Death and Survival                      | 29    | 10              | ALKBH7,APP,C11orf52,C11orf71,C2orf49,C9orf64,CAMKMT,CD40LG,CYB561D2,DTWD1,EPA S1,HNF4A,HPF1,Insulin,MCEE,MPV17L,NBPF3,NFkB (complex),NTRK1,omega-muricholic acid,PI3K (complex),PIGF,PPIP5K2,PPM1B,PREPL,PRKCE,PURG,RHOQ,RSPH3,SIX2,SLC3A1,SRBD1,THYN1,TP53,TP53TG5 |
| 4  | I4       | Molecular Transport, Hereditary Disorder, Metabolic Disease                                                    | 3     | 1               | ATP6V1B1,ATP6V1C2,ATP6V1E2,ATP6V1G1,C9orf16,H+-exporting ATPase,RICTOR,Vacuolar H+ ATPase                                                                                                                                                                           |
| 5  | I5       | Cancer, Organismal Injury and Abnormalities, Reproductive System Disease                                       | 21    | 7               | ACOT1,AIM1,ANGPTL2,CDC42SE1,CHST2,CNNM4,COG7,CUL3,DCTN5,DDX10,EARS2,ERBB2,ESR1,FAM98B,GGA2,LCN1,MAN1A1,NDUFAB1,NTRK1,PALB2,PCDH8,PCNA,PGM3,PRR15L,PTPRT,RHOBTB2,RTN4RL1,SPAG1,SPAG4,SUPV3L1,THADA,UBAP2,UBFD1,WDR81,ZSWIM8                                          |
| 6  | I6       | Cellular Development, Embryonic Development, Hair and Skin Development and Function                            | 12    | 4               | BCL9,Bcl9-Cbp/p300-Ctnnb1-Lef/Tcf,C12orf49,C5orf22,CASC4,CDH6,CDH7,CDH8,CDH9,CDH10,CDH15,CDH18,CNMD,CTBS,CTDSPL,CTNNB1,CTNNβ-LEF1,DACT3,DROSHA,DUSP7,ELAVL1,FBXO8,GLIPR1,GPX2,MUM1,MYBPH,MYC,PDZD2,RPL41,TCF4-CTNNβ,TMEM2,Trp53cor1,UST,VEZT,ZXDB                   |
| 7  | I7       | Immunological Disease, Inflammatory Disease, Inflammatory Response                                             | 4     | 1               | IL1B,KCNH8,PTGER3                                                                                                                                                                                                                                                   |
| 8  | I7       | Cell Cycle, Organ Morphology, Visual System Development and Function                                           | 3     | 1               | ABTB1,BTLA,CLEC2B,CORO6,Cux1,ENOSF1,EPSTI1,EVI2A,FAM110A,FAM129A,FAM65B,FOXJ3,Foxp2,GPR18,GPT2,HELZ2,HLA-DOB,HSF5,HVCN1,Ighen,LAG3,LPIN2,LRRN3,MT1A,MYCL,PIK3IP1,POU3F4,QSER1,SATB1, TBX6,TMEM2,TMEM117,TMEM241,ZKSCAN8,ZNF287                                      |

| ID | Interval | Top Diseases and Functions                                                                                          | Score | Focus Molecules | Molecules in Network                                                                                                                                                                                                                                                                          |
|----|----------|---------------------------------------------------------------------------------------------------------------------|-------|-----------------|-----------------------------------------------------------------------------------------------------------------------------------------------------------------------------------------------------------------------------------------------------------------------------------------------|
| 9  | 18       | Cell Cycle, DNA Replication, Recombination, and Repair, Developmental Disorder                                      | 52    | 26              | 26sProteasome,Actin,BANF1,CAPN1,caspase,CD3,CTSW,DDB1,DPF2,EEF1G,ESRRA,FEN1,FERMT3,FKBP2,HISTONE,Histone h3,Histone h4,INCENP,INTS5,KAT5,KCNK4,MAP4K2,MTA2,MUS81,NFkB (complex),OTUB1,POLA2,POLR2G,PRDX5,RNA polymerase II,RPL13A,SF1,SF3B2,TAF6L,UBXN1                                       |
| 10 | 18       | Lipid Metabolism, Small Molecule Biochemistry, Infectious Diseases                                                  | 42    | 22              | Akt,BSCL2,Calmodulin,CDCA5,CHRM1,Ck2,ERK,estrogen receptor,FADS1,FADS2,FAU,FIBP,FSH,GANAB,Hsp90,Insulin,LGALS12,Lh,Mapk,MYRF,PLA2,PLA2G16,PLC,PLCB3,PPP2R5B,RELA,SCGB1A1,SLC22A8,SLC3A2,STAT5a/b,STIP1,STX5,SYT7,SYVN1,TMEM216                                                                |
| 11 | 18       | Lipid Metabolism, Small Molecule Biochemistry, Cellular Assembly and Organization                                   | 32    | 18              | AES,AHNAK,ARL2,C11orf68,C20orf194,CCT3,CDC37,CPSF7,DAGLA,DUS3L,EIF1AD,EML3,GPR137,GPR174,HSP90AA1,KCNK7,KLF3,MAP3K1,MAP3K15,MRPL49,MYLK4,NUDT22,NXF1,PDIK1L,PSKH1,RAB3IL1,SSSCA1,STAT4,SUPT5H,TRMT112,TTC9C,TUBB,TUT1,YWHAQ,ZBTB3                                                             |
| 12 | 18       | Cellular Assembly and Organization, Cell-To-Cell Signaling and Interaction, Nervous System Development and Function | 25    | 15              | 14-3-3,Alp,Ap1,BAD,BRMS1,CDC42EP2,CFL1,Creb,ERK1/2,F-Actin,Fibrinogen,FOSL1,Igg3,IgG2a,Igm,Immunoglobulin,KLC2,LDL,LTBP3,MARK2,MEN1,PACS1,PDGF BB,Pka,Pka catalytic subunit,PP2A,Rap1,Ras,RASGRP2,RIN1,Rock,RPS6KA4,Rsk,SIPA1,VEGFB                                                           |
| 13 | 18       | Cellular Compromise, Gastrointestinal Disease, Hepatic System Disease                                               | 25    | 15              | ABHD2,ATG2A,BRCA1,C11orf84,C11orf98,CDC42BPG,Cyp2d1/Cyp2d5,DNAJB1,Dnajb1-Hsp70,DNAJC4,DNAJC16,EGFR,EHD1,Esr1-Estrogen-Sp1,FAM153A/FAM153B,HLA-C,HNRNPUL2,HSCB,HSPA9,HSPB1,lipid,MACROD1,MDC1,NAA40,PGA5 (includes others),RCOR2,RPL22,SDHAF2,SP1,SUMO2,TMCO3,TMEM223,tretinoin,TSGA10IP,XRCC5 |
| 14 | 18       | Nutritional Disease, Cell Morphology, Cell-To-Cell Signaling and Interaction                                        | 21    | 13              | APP,ATL3,C15orf39,CACNG2,CACNG3,CACNG8,CNIH2,DRAP1,FRMD8,GORAB,GRIA1,HIST1H2AD,HRASLS5,INIP,MAD2L1,N-acetyl-L-aspartic acid,OLFM1,OLFM3,PDCD7,PPP1R32,RABL3,REEP6,RTN3,SAC3D1,SCYL1,SLC22A6,SLC30A3,SNX1,SNX14,SNX15,SNX32,SP140L,TCP11L1,TRPT1,ZCCHC6                                        |
| 15 | 18       | Cancer, Cell Death and Survival, Organismal Injury and Abnormalities                                                | 21    | 13              | ADIRF,AP5B1,ASRGL1,B3GAT3,BCL2,beta-estradiol,CAMK2B,CD248,FADS3,GSK3B,IFNB1,JUNB,PELP1,PHACTR3,PP1 protein complex group,PPP1R11,PPP1R17,PPP1R14B,PPP1R14C,PPP1R14D,PPP2CA,PPP2R3d,PSMC3,PXYLP1,PYGM,REM1,RNASEH2C,SCGB2A1,TGFB2,TKFC,TMEM44,TMEM258,VPS51,WDR74,YAP/TAZ                     |
| 16 | 18       | Cellular Function and Maintenance, Organ Development, Reproductive System Development and Function                  | 19    | 12              | adenosine,AIFM2,CACNA11,CATSPER,CATSPER1,CATSPER2,CATSPER3,CATSPER4,CYB561A3,EFEMP2,EGF,KCTD11,LSM14A,NRXN2,PPARD,PRPF8,RNU4-1,RNU5A-1,ROM1,SART1,SLC29A2,SLC30A6,SNRNP27,TMED7,TMEM17,TMEM138,TMEM151A,TP53,UBIAD1,UBL5,USO1,voltage-gated calcium channel,YIF1A,ZFPL1,ZNHIT2                |

| ID | Interval | Top Diseases and Functions                                                                                                | Score | Focus Molecules | Molecules in Network                                                                                                                                                                                                                                                                                                                                                                                                                                                                                                                                                                                                                             |
|----|----------|---------------------------------------------------------------------------------------------------------------------------|-------|-----------------|--------------------------------------------------------------------------------------------------------------------------------------------------------------------------------------------------------------------------------------------------------------------------------------------------------------------------------------------------------------------------------------------------------------------------------------------------------------------------------------------------------------------------------------------------------------------------------------------------------------------------------------------------|
| 17 | 18       | Cell Death and Survival, Gastrointestinal Disease, Organismal Injury and Abnormalities                                    | 17    | 11              | ADGRA1,ADGRG6,Akr1c19,B4GAT1,BEST1,Ca2+,CCDC85B,CPQ,CST6,FLRT1,FPR3,GAL3ST3,GPHA2,GPHB5,GPR19,GPR21,GPR85,GPR108,GPR146,GPR156,HNF1A,NPFFR2,NPS,OSM,P2RY10,PCNX3,PTH1R,SLC22A11,SLC22A12,SOX9,TGFB1,TM7SF2,TRPM5,TSHR,UGT2A3<br>BATF2,CCDC88B,Ctla2a/Ctla2b,CYP4Z1,Egfr-ErbB2,ESR2,Granzyme,IkB-NfκB,IKK (complex),IL12 (complex),IL12 (family),IL22R1-IL10R2,IRS1/2,isoleucine,Jnk,MIP1,miR-146a-5p (and other miRNAs w/seed GAGAACU),N-arachidonylglycine,OVOL1,P38 MAPK,p85 (pik3r),PI3K (complex),Pkc(s),POU6F1,Rap1-gp91-p22 phox-p40 phox-p47 phox-p67 phox,Sh2b3,SHISA2,TCR,TIGD3,TLR2/TLR4,TPST1,TRAF1-TRAF2-TRAF3,Vegf,Vegfr dimer,VWCE |
| 18 | 18       | Organ Morphology, Organismal Injury and Abnormalities, Reproductive System Development and Function                       | 6     | 5               |                                                                                                                                                                                                                                                                                                                                                                                                                                                                                                                                                                                                                                                  |
| 19 | 18       | Developmental Disorder, Hereditary Disorder, Metabolic Disease                                                            | 2     | 1               | PHLDA3,UQCC3                                                                                                                                                                                                                                                                                                                                                                                                                                                                                                                                                                                                                                     |
| 20 | 18       | Cancer, Organismal Injury and Abnormalities, Reproductive System Disease                                                  | 2     | 1               | SCGB1D2,SCGB2A2                                                                                                                                                                                                                                                                                                                                                                                                                                                                                                                                                                                                                                  |
| 21 | 18       | Hereditary Disorder, Nephrosis, Organismal Injury and Abnormalities                                                       | 2     | 1               | METTL12,NT5DC2,XPNPEP3                                                                                                                                                                                                                                                                                                                                                                                                                                                                                                                                                                                                                           |
| 22 | 19       | Developmental Disorder, Hereditary Disorder, Metabolic Disease                                                            | 58    | 25              | 26sProteasome,ALK,BIRC6,BRE,caspase,CENPA,Cg,CGREF1,CYP1B1,DNMT3A,DPY30,EMILIN1,ERK1/2,FOSL2,GCKR,GPN1,HADHA,HADHB,Histone h3,Jnk,KHK,mediator,MEMO1,NFκB (complex),NLRC4,Pkc(s),PRKD3,RASGRP3,RNA polymerase II,SPAST,SPDYA,SRD5A2,SUPT7L,XDH,YWHAE                                                                                                                                                                                                                                                                                                                                                                                             |
| 23 | 19       | Auditory and Vestibular System Development and Function, Cell Death and Survival, Nervous System Development and Function | 32    | 16              | APP,ASXL2,ATRAID,CEBPZ,CIART,CLIP4,CREB1,CRIM1,DPY19L3,FBXO6,FNDCA,GIMAP8,GPR85,IGSF10,KCNC4,MT-ND5,NAGA,NDUFAF7,NMNAT2,NPM1,OCIAD2,PPM1G,PRKACA,QPCT,RAB10,RMDN2,SLC4A1AP,SLC9A6,SNX17,TMEM214,TTC27,WARS2,ZDHHC23,ZNF35,ZNF512                                                                                                                                                                                                                                                                                                                                                                                                                 |
| 24 | 19       | Cellular Assembly and Organization, Cancer, Cell Morphology                                                               | 30    | 15              | 24R,25-dihydroxyvitamin D3,ABCA1,AGPAT5,ANGPT4,C3orf52,CYP4Z1,DTNB,ELAVL1,ERBB2,FAM20B,FAM98A,GALNT4,GALNT14,HEATR5B,IFT172,LBH,LCLAT1,LPCAT4,MAPK3,norepinephrine,NRBP1,NUDC,PDE7B,PRES,PRKCD,SELENOI,SLC35F6,STRN,TAS1R1,TC2N,TCF23,Vegf,VHL,WDR43,YPEL5                                                                                                                                                                                                                                                                                                                                                                                       |
| 25 | 19       | Cell Morphology, Cellular Assembly and Organization, Nervous System Development and Function                              | 20    | 11              | ACTB,ADGRA1,ADGRF3,AGBL5,CDC42EP3,Clip1,DLG4,DPYSL5,EHD3,FEZ2,FOS,GPR63,GPR137,GPR146,GPR160,HNF4A,KBTBD4,KIF3C,MAPRE3,MSRB2,NGF,NUDT11,ornithine decarboxylase,PCNX1,PTEN,Ptprt,QRFPR,RBKS,SLC30A6,SORCS3,SSTR4,SSU72,TRMT61B,Uba52,VN1R1                                                                                                                                                                                                                                                                                                                                                                                                       |

| ID | Interval | Top Diseases and Functions                                                                                       | Score | Focus Molecules | Molecules in Network                                                                                                                                                                                                                                                                                                                     |
|----|----------|------------------------------------------------------------------------------------------------------------------|-------|-----------------|------------------------------------------------------------------------------------------------------------------------------------------------------------------------------------------------------------------------------------------------------------------------------------------------------------------------------------------|
| 26 | I9       | Amino Acid Metabolism, Carbohydrate Metabolism, Molecular Transport                                              | 18    | 10              | Akt,ANGPTL1,ARTN,BMP3,CCDC121,CD38,CLEC4A,CLEC4C,Cyp2j9,DEFB1,DRC1,EIF2B4,ERK,GAREM2,GPATCH11,IFNA2,Insulin,KDM1A,LTBP1,Na+,NANOG,NMN,NMUR2,NRG4,PLB1,PPP1CB,PRR30,S100a7a,SCD5,SLC2A9,SLC5A6,SLC8B1,SLC9A5,THEMIS2,VTCN1                                                                                                                |
| 27 | I9       | Cell Cycle, DNA Replication, Recombination, and Repair, Cellular Development                                     | 2     | 1               | ABHD1,CCDC155                                                                                                                                                                                                                                                                                                                            |
| 28 | I9       | Neurological Disease, Organismal Injury and Abnormalities, Psychological Disorders                               | 2     | 1               | CIB4,UBB,ZNHIT2                                                                                                                                                                                                                                                                                                                          |
| 29 | I10      | Cell Morphology, Cellular Function and Maintenance, Cardiovascular Disease                                       | 36    | 12              | ADAT1,ATMIN,ATP6V1C1,AZIN1,BAALC,C9orf64,CA5B,CDK5,CHEK2,CTHRC1,D-glucose,DCAF13,DZANK1,EED,ELAVL1,FZD6,GPR137,GPR180,GUF1,HCN3,HNF4A,KIAA0895,KLF10,ODF1,RIMS2,RRM2B,SLC16A5,SLC25A32,SLC43A2,SMIM7,SMIM12,TMEM101,TNF,UBR5,VN1R1                                                                                                       |
| 30 | I12      | Cell Cycle, Cellular Growth and Proliferation, Tissue Morphology                                                 | 22    | 8               | ADGRD1,ADGRD2,ADGRF2,ADGRF3,ADGRF4,ADGRG5,CACYBP,DEFB114,ERK1/2,Gpccr,GP R52,GPR61,GPR62,GPR82,GPR149,GPR150,GPR152,GPR157,GPR162,GPR137C,MAS1L,MR PS14,NPFFR1,PAPPA2,RABGAP1L,RB1,RFWD2,RRH,TNF,TNN,TNR,TP53,tretinoin,VN1R1,V N1R2                                                                                                     |
| 31 | I12      | Connective Tissue Development and Function, Connective Tissue Disorders, Nervous System Development and Function | 3     | 1               | KIAA0040,KRTAP10-3,MDF1                                                                                                                                                                                                                                                                                                                  |
| 32 | I12      | Infectious Diseases, Immunological Disease, Hematological System Development and Function                        | 3     | 1               | AHR,IL10RA,NXPE2                                                                                                                                                                                                                                                                                                                         |
| 33 | I14      | Developmental Disorder, Hereditary Disorder, Immunological Disease                                               | 26    | 10              | 5-oxo-6-8-11-14-(e,z,z,z)-eicosatetraenoic acid,ADGRG6,ALK3-BMPR2,C1q,C1QA,C1QB,C1QC,CDC42,CNR2,CR,CYP4Z1,ECE1,EPHA8,EPHB2,ERK,ERK1/2,Focal adhesion kinase,ganglioside GD2,GPR171,HSPG2,KDM1A,LAIR2,Mapk,N-arachidonylglycine,NMUR1,noladin ether,P38 MAPK,PI3K (complex),PIK3R6,Pka,RXFP3,SCARF1,STYX,TAS1R1,tetraiodothyroacetic acid |
| 34 | I14      | Cell Signaling, Nucleic Acid Metabolism, Small Molecule Biochemistry                                             | 11    | 5               | ADCY4,ADRA2C,ADRB2,APP,BACE2,CPLX1,Dstn/Dstnl1,endocannabinoid,F2RL3,FUCA1,FZD 3,GALE,GPR3,GPR6,GPR12,GPR15,GPR61,GPR78,GPR85,GPRC5B,HMGCL,HTR1B,HTR1D, LPAR3,LUZP1,MRAP2,PIK3R5,PTGDR,RXFP3,S1PR1,SCTR,SLC52A2,SNURF,SP1,VIPR2                                                                                                          |



| ID | Interval | Top Diseases and Functions                                                                 | Score | Focus Molecules | Molecules in Network                                                                                                                                                                                                                                                                                                                                                                                        |
|----|----------|--------------------------------------------------------------------------------------------|-------|-----------------|-------------------------------------------------------------------------------------------------------------------------------------------------------------------------------------------------------------------------------------------------------------------------------------------------------------------------------------------------------------------------------------------------------------|
| 35 | I14      | Cellular Assembly and Organization, Developmental Disorder, Hereditary Disorder            | 2     | 1               | CDC37,DLG4,FHL1,FOXB1,IER2,ZBTB40                                                                                                                                                                                                                                                                                                                                                                           |
| 36 | I15      | Cellular Development, Cellular Growth and Proliferation, Cell Death and Survival           | 27    | 10              | BCL2,CENPC,CLOCK,DCTPP1,Defb8,EPHA5,ERMAP,HRAS,IGDCC3,IGF1,Igf1-Igfbp,IGFBP7,I11bos,miR-1195 (miRNAs w/seed GAGUUCG),miR-153-3p (miRNAs w/seed UGCAUAG),Mucl1/Mucl2,NOA1,PCDHAC2,POLR2B,POLR2J2/POLR2J3,PPIC,RDM1,REST,RN A Pol-II-TFIIA-TFIIB-TFIID-TFIIF,RNA polymerase II,SCG3,SLC9A8,SNORD118,SPAG7,SPP1,STAT3,TMEM165,TMSB10/TMSB4X,tretinoin,ZNF74                                                    |
| 37 | I15      | Cell Cycle, Cellular Assembly and Organization, DNA Replication, Recombination, and Repair | 6     | 3               | ADGRL3,CCDC14,CCDC18,CCDC61,CCDC77,CENPJ,CEP72,CEP120,CEP131,CEP135,CEP162,CEP290,CEP295,CEP350,CTNND1,CYLD,EXOC1,FGFR1OP,FOPNL,GYS1,KIAA0753,LUZP1,MAPRE1,MIB1,MTNR1A,NEDD1,PIBF1,PRKAR2A,PRKD1,RALA,SIPA1L1,SIPA1L2,SPATA2,TBC1D31,TMEFF1                                                                                                                                                                 |
| 38 | I15      | Cancer, Endocrine System Disorders, Neurological Disease                                   | 3     | 1               | CXorf56,GOLGA1,PDCL2                                                                                                                                                                                                                                                                                                                                                                                        |
| 39 | I16      | Cancer, Hematological Disease, Immunological Disease                                       | 17    | 6               | ARHGAP12,beta-estradiol,Crip2,CUBN,CUL7,DNPH1,EPC1,ER- $\alpha$ -Estradiol,FMO1,Gm13194,GPX2,Hmgn2 (includes others),Jnk dimer,JUN,KIF5B,Magea3 (includes others),mir-383,mir-99,MYC,PADI1,PGLYRP2,Ppp1r15a,PRDM2,SCPEP1,SDK1,Snrpc,Sprr2b,Sprr2g,SVIL,TP53,TRIM6,TSKU,UBL3,YY2,ZEB1                                                                                                                        |
| 40 | I16      | Cell Cycle, Cancer, Developmental Disorder                                                 | 3     | 1               | ERV3-1,HECW2                                                                                                                                                                                                                                                                                                                                                                                                |
| 41 | I17      | Hair and Skin Development and Function, Cellular Compromise, Cell Morphology               | 18    | 6               | ADGRG6,ANKRD42,B4GALT6,C10orf10,CCDC90B,DEFB114,DLG2,EMCN,FAM132A,FUT3,goralatide,GPR37L1,GUF1,HNF4A,MAPK3,NUDT6,NUDT11,ORM2,PAFAH2,PCF11,PFKFB4,PPP1CA,PPP1R11,PPP1R14D,PRCP,RAB30,RASGRP4,SSTR4,TMEM176B,TNF,ULBP3,UTP11,ZBTB11,ZCCHC9,ZNF300                                                                                                                                                             |
| 42 | I18      | Drug Metabolism, Molecular Transport, Cellular Function and Maintenance                    | 28    | 11              | ADAM10,AFM,ANGPTL7,ANXA11,APP,C2orf57,CALML4,CCSER2,CDHR1,DEF6,DEFA4,DYDC1,DYDC2,ethanol,EZH2,FAM213A,Fcna,FLRT1,GIMAP6,GPR21,GRID1,KIAA0513,MAT1A,MPV17L,NME5,NRG3,OARD1,SLC13A3,TGFB1,THSD4,tretinoin,TSPAN14,TSPAN33,VAT1L,ZMIZ1,ADGRD1,ADGRD2,ADGRF2,ADGRF3,ADGRF4,ADGRG5,EPO,GHITM,Gpcr,GPR27,GPR61,GP R62,GPR75,GPR82,GPR139,GPR148,GPR149,GPR150,GPR152,GPR157,GPR162,GPR137C,HNF4A,LRIT1,MAS1L,NFkB |
| 43 | I18      | Cell Morphology, Cellular Function and Maintenance, Organismal Development                 | 13    | 6               | (complex),NPFFR1,OXGR1,PPIF,RGR,RRH,SFTPA1,SFTPD,VN1R1,VN1R2                                                                                                                                                                                                                                                                                                                                                |

| ID | Interval | Top Diseases and Functions                                                                      | Score | Focus Molecules | Molecules in Network                                                                                                                                                                                                                                                                                     |
|----|----------|-------------------------------------------------------------------------------------------------|-------|-----------------|----------------------------------------------------------------------------------------------------------------------------------------------------------------------------------------------------------------------------------------------------------------------------------------------------------|
| 44 | I18      | Cardiovascular Disease, Hereditary Disorder, Neurological Disease                               | 2     | 1               | CCDC14,EMILIN1,PLAC9,RAPGEF5,RNF213                                                                                                                                                                                                                                                                      |
| 45 | I19      | Post-Translational Modification, Gene Expression, Cellular Development                          | 11    | 4               | Calcineurin<br>B,CD6,DUSP2,DUSP8,DUSP16,EPHA1,EPHA4,EYA2,FARSB,FZD10,G0S2,glycochenodeoxycholate,GSTA2,GSTM2,HNF4α dimer,IL36B,Jnk,mir-101,MKP2/5,NUDT1,PAX3,PPP1R16B,PPP2R5B,PRAM1,PTPRH,RLBP1,S1PR4,S1PR5,SGPP2,SH2D3C,sphingosine-1-phosphate,sphingosine-1-phosphate phosphatase,SRGN,TFF2,tretinoin |
| 46 | I19      | Cell-mediated Immune Response, Cellular Movement, Hematological System Development and Function | 3     | 1               | 2-acylglycerol O-acyltransferase,AGPAT2,BSCL2,Ccl2,CD44,CXCL10,diacylglycerol O-acyltransferase,MOGAT1,TIMP1,triacylglycerol                                                                                                                                                                             |

**Table S9.** Transcription factor binding sites for the *PPARG* gene.

| <b>ID</b> | <b>Target Name</b> | <b>Interval</b> | <b>Cis/Trans-eQTL</b> | <b>Associated Gene</b> |
|-----------|--------------------|-----------------|-----------------------|------------------------|
| 1         | ABHD1              | 19              | <i>trans</i>          | <i>FABP4</i>           |
| 2         | ADIPOQ             |                 |                       |                        |
| 3         | AGPAT2             |                 |                       |                        |
| 4         | AHNAK              | 18              | <i>trans</i>          | <i>FABP4</i>           |
| 5         | ALK                | 19              | <i>trans</i>          | <i>FABP4</i>           |
| 6         | ATL3               | 18              | <i>trans</i>          | <i>FABP4</i>           |
| 7         | ATP6V1C1           | 110             | <i>trans</i>          | <i>FABP4</i>           |
| 8         | AZIN1              | 110             | <i>trans</i>          | <i>FABP4</i>           |
| 9         | B3GNT2             | 13              | <i>trans</i>          | <i>ACSM5</i>           |
| 10        | BAD                | 18              | <i>trans</i>          | <i>FABP4</i>           |
| 11        | BATF2              | 18              | <i>trans</i>          | <i>FABP4</i>           |
| 12        | BEST1              | 18              | <i>trans</i>          | <i>FABP4</i>           |
| 13        | C1QA               | 114             | <i>trans</i>          | <i>FADS2</i>           |
| 14        | C2orf16            | 19              | <i>trans</i>          | <i>FABP4</i>           |
| 15        | C2orf71            | 19              | <i>trans</i>          | <i>FABP4</i>           |
| 16        | CAPN14             | 19              | <i>trans</i>          | <i>FABP4</i>           |
| 17        | CD248              | 18              | <i>trans</i>          | <i>FABP4</i>           |
| 18        | CD36               |                 |                       |                        |
| 19        | CDC42BPG           | 18              | <i>trans</i>          | <i>FABP4</i>           |
| 20        | CDC42EP2           | 18              | <i>trans</i>          | <i>FABP4</i>           |
| 21        | CDC42EP3           | 19              | <i>trans</i>          | <i>FABP4</i>           |
| 22        | CDH6               | 16              | <i>trans</i>          | <i>ACSM5</i>           |
| 23        | CDHR1              | 118             | <i>trans</i>          | <i>SLC27A4</i>         |
| 24        | CENPA              | 19              | <i>trans</i>          | <i>FABP4</i>           |
| 25        | CEP135             | 115             | <i>trans</i>          | <i>FADS2</i>           |
| 26        | CHRM1              | 18              | <i>trans</i>          | <i>FABP4</i>           |
| 27        | CIB4               | 19              | <i>trans</i>          | <i>FABP4</i>           |
| 28        | CLOCK              | 115             | <i>trans</i>          | <i>FADS2</i>           |
| 29        | CPSF7              | 18              | <i>trans</i>          | <i>FABP4</i>           |
| 30        | CPT1A              |                 |                       |                        |
| 31        | CRIM1              | 19              | <i>trans</i>          | <i>FABP4</i>           |
| 32        | CST6               | 18              | <i>trans</i>          | <i>FABP4</i>           |
| 33        | CTHRC1             | 110             | <i>trans</i>          | <i>FABP4</i>           |
| 34        | CTXN3              | 11              | <i>trans</i>          | <i>ACSM5</i>           |
| 35        | CUBN               | 116             | <i>trans</i>          | <i>FADS2</i>           |
| 36        | CYP2U1             |                 |                       |                        |
| 37        | DAGLA              | 18              | <i>trans</i>          | <i>FABP4</i>           |
| 38        | DDB1               | 18              | <i>trans</i>          | <i>FABP4</i>           |
| 39        | DGAT1              |                 |                       |                        |
| 40        | DGAT2              |                 |                       |                        |

| <b>ID</b> | <b>Target Name</b> | <b>Interval</b> | <b>Cis/Trans-eQTL</b> | <b>Associated Gene</b> |
|-----------|--------------------|-----------------|-----------------------|------------------------|
| 41        | <i>DLG2</i>        | 117             | <i>trans</i>          | <i>SLC27A4</i>         |
| 42        | <i>DNMT3A</i>      | 19              | <i>trans</i>          | <i>FABP4</i>           |
| 43        | <i>ECE1</i>        | 114             | <i>trans</i>          | <i>FADS2</i>           |
| 44        | <i>EHBP1</i>       | 13              | <i>trans</i>          | <i>ACSM5</i>           |
| 45        | <i>EHD3</i>        | 19              | <i>trans</i>          | <i>FABP4</i>           |
| 46        | <i>ELOVL5</i>      |                 |                       |                        |
| 47        | <i>EMILIN1</i>     | 19              | <i>trans</i>          | <i>FABP4</i>           |
| 48        | <i>EML3</i>        | 18              | <i>trans</i>          | <i>FABP4</i>           |
| 49        | <i>EPAS1</i>       | 14              | <i>trans</i>          | <i>ACSM5</i>           |
| 50        | <i>EPC1</i>        | 116             | <i>trans</i>          | <i>FADS2</i>           |
| 51        | <i>EPHA8</i>       | 114             | <i>trans</i>          | <i>FADS2</i>           |
| 52        | <i>EPT1</i>        | 19              | <i>trans</i>          | <i>FABP4</i>           |
| 53        | <i>ESRRA</i>       | 18              | <i>trans</i>          | <i>FABP4</i>           |
| 54        | <i>FABP4</i>       |                 |                       |                        |
| 55        | <i>FADS1</i>       | 18              | <i>trans</i>          | <i>FABP4</i>           |
| 56        | <i>FADS2</i>       | 18.113          | <i>trans/cis</i>      | <i>FABP4/FADS2</i>     |
| 57        | <i>FADS3</i>       | 18              | <i>trans</i>          | <i>FABP4</i>           |
| 58        | <i>FAM179A</i>     | 19              | <i>trans</i>          | <i>FABP4</i>           |
| 59        | <i>FKBP2</i>       | 18              | <i>trans</i>          | <i>FABP4</i>           |
| 60        | <i>FLRT1</i>       | 18              | <i>trans</i>          | <i>FABP4</i>           |
| 61        | <i>FNDC4</i>       | 19              | <i>trans</i>          | <i>FABP4</i>           |
| 62        | <i>FOSL1</i>       | 18              | <i>trans</i>          | <i>FABP4</i>           |
| 63        | <i>FOSL2</i>       | 19              | <i>trans</i>          | <i>FABP4</i>           |
| 64        | <i>FRMD8</i>       | 18              | <i>trans</i>          | <i>FABP4</i>           |
| 65        | <i>GAL3ST3</i>     | 18              | <i>trans</i>          | <i>FABP4</i>           |
| 66        | <i>GALNT14</i>     | 19              | <i>trans</i>          | <i>FABP4</i>           |
| 67        | <i>GCKR</i>        | 19              | <i>trans</i>          | <i>FABP4</i>           |
| 68        | <i>GGA2</i>        | 15              | <i>trans</i>          | <i>ACSM5</i>           |
| 69        | <i>GPR52</i>       | 112             | <i>trans</i>          | <i>FABP4</i>           |
| 70        | <i>GRID1</i>       | 118             | <i>trans</i>          | <i>SLC27A4</i>         |
| 71        | <i>HADHA</i>       | 19              | <i>trans</i>          | <i>FABP4</i>           |
| 72        | <i>HSPG2</i>       | 114             | <i>trans</i>          | <i>FADS2</i>           |
| 73        | <i>IGFBP7</i>      | 115             | <i>trans</i>          | <i>FADS2</i>           |
| 74        | <i>KCNH8</i>       | 17              | <i>trans</i>          | <i>ELOVL6</i>          |
| 75        | <i>KHK</i>         | 19              | <i>trans</i>          | <i>FABP4</i>           |
| 76        | <i>KIAA0040</i>    | 112             | <i>trans</i>          | <i>FABP4</i>           |
| 77        | <i>KIF5B</i>       | 116             | <i>trans</i>          | <i>FADS2</i>           |
| 78        | <i>KLC2</i>        | 18              | <i>trans</i>          | <i>FABP4</i>           |
| 79        | <i>KLF10</i>       | 110             | <i>trans</i>          | <i>FABP4</i>           |
| 80        | <i>LBH</i>         | 19              | <i>trans</i>          | <i>FABP4</i>           |

| <b>ID</b> | <b>Target Name</b> | <b>Interval</b> | <b>Cis/Trans-eQTL</b> | <b>Associated Gene</b> |
|-----------|--------------------|-----------------|-----------------------|------------------------|
| 81        | <i>LCLAT1</i>      | 19              | <i>trans</i>          | <i>FABP4</i>           |
| 82        | <i>LIPC</i>        |                 |                       |                        |
| 83        | <i>LMNB1</i>       | 11              | <i>trans</i>          | <i>ACSM5</i>           |
| 84        | <i>LPIN1</i>       |                 |                       |                        |
| 85        | <i>LRRC10B</i>     | 18              | <i>trans</i>          | <i>FABP4</i>           |
| 86        | <i>LTBP1</i>       | 19              | <i>trans</i>          | <i>FABP4</i>           |
| 87        | <i>LTBP3</i>       | 18              | <i>trans</i>          | <i>FABP4</i>           |
| 88        | <i>LUZP1</i>       | 114             | <i>trans</i>          | <i>FADS2</i>           |
| 89        | <i>MACROD1</i>     | 18              | <i>trans</i>          | <i>FABP4</i>           |
| 90        | <i>MAP4K2</i>      | 18              | <i>trans</i>          | <i>FABP4</i>           |
| 91        | <i>MAPRE3</i>      | 19              | <i>trans</i>          | <i>FABP4</i>           |
| 92        | <i>MARCH3</i>      | 11              | <i>trans</i>          | <i>ACSM5</i>           |
| 93        | <i>MARK2</i>       | 18              | <i>trans</i>          | <i>FABP4</i>           |
| 94        | <i>MDH1</i>        | 13              | <i>trans</i>          | <i>ACSM5</i>           |
| 95        | <i>MEGF10</i>      | 11              | <i>trans</i>          | <i>ACSM5</i>           |
| 96        | <i>MGLL</i>        |                 |                       |                        |
| 97        | <i>MIR194-2</i>    | 18              | <i>trans</i>          | <i>FABP4</i>           |
| 98        | <i>MLXIPL</i>      |                 |                       |                        |
| 99        | <i>MOGAT1</i>      | 119             | <i>trans</i>          | <i>SLC27A4</i>         |
| 100       | <i>MRPL49</i>      | 18              | <i>trans</i>          | <i>FABP4</i>           |
| 101       | <i>NR1H3</i>       |                 |                       |                        |
| 102       | <i>NRXN2</i>       | 18              | <i>trans</i>          | <i>FABP4</i>           |
| 103       | <i>NUDT22</i>      | 18              | <i>trans</i>          | <i>FABP4</i>           |
| 104       | <i>OVOL1</i>       | 18              | <i>trans</i>          | <i>FABP4</i>           |
| 105       | <i>PAPPA2</i>      | 112             | <i>trans</i>          | <i>FABP4</i>           |
| 106       | <i>PCNXL3</i>      | 18              | <i>trans</i>          | <i>FABP4</i>           |
| 107       | <i>PDZD2</i>       | 16              | <i>trans</i>          | <i>ACSM5</i>           |
| 108       | <i>PEX2</i>        |                 |                       |                        |
| 109       | <i>PLA2G16</i>     | 18              | <i>trans</i>          | <i>FABP4</i>           |
| 110       | <i>PLAC9</i>       | 118             | <i>trans</i>          | <i>SLC27A4</i>         |
| 111       | <i>PLCB2</i>       |                 |                       |                        |
| 112       | <i>PLCB3</i>       | 18              | <i>trans</i>          | <i>FABP4</i>           |
| 113       | <i>PNPLA2</i>      |                 |                       |                        |
| 114       | <i>POU2F1</i>      |                 |                       |                        |
| 115       | <i>PPARA</i>       |                 |                       |                        |
| 116       | <i>PPARG</i>       |                 |                       |                        |
| 117       | <i>PPIF</i>        | 118             | <i>trans</i>          | <i>SLC27A4</i>         |
| 118       | <i>PPM1B</i>       | 14              | <i>trans</i>          | <i>ACSM5</i>           |
| 119       | <i>PPP1R14B</i>    | 18              | <i>trans</i>          | <i>FABP4</i>           |
| 120       | <i>PRKCE</i>       | 14              | <i>trans</i>          | <i>ACSM5</i>           |

| <b>ID</b> | <b>Target Name</b> | <b>Interval</b> | <b>Cis/Trans-eQTL</b> | <b>Associated Gene</b> |
|-----------|--------------------|-----------------|-----------------------|------------------------|
| 121       | <i>PRKD3</i>       | 19              | <i>trans</i>          | <i>FABP4</i>           |
| 122       | <i>PRRC1</i>       | 11              | <i>trans</i>          | <i>ACSM5</i>           |
| 123       | <i>PYGM</i>        | 18              | <i>trans</i>          | <i>FABP4</i>           |
| 124       | <i>RAB30</i>       | 117             | <i>trans</i>          | <i>SLC27A4</i>         |
| 125       | <i>RAB3IL1</i>     | 18              | <i>trans</i>          | <i>FABP4</i>           |
| 126       | <i>RABGAP1L</i>    | 112             | <i>trans</i>          | <i>FABP4</i>           |
| 127       | <i>RASGRP2</i>     | 18              | <i>trans</i>          | <i>FABP4</i>           |
| 128       | <i>RASGRP3</i>     | 19              | <i>trans</i>          | <i>FABP4</i>           |
| 129       | <i>RBP4</i>        |                 |                       |                        |
| 130       | <i>RCOR2</i>       | 18              | <i>trans</i>          | <i>FABP4</i>           |
| 131       | <i>REST</i>        | 115             | <i>trans</i>          | <i>FADS2</i>           |
| 132       | <i>RHOQ</i>        | 14              | <i>trans</i>          | <i>ACSM5</i>           |
| 133       | <i>RIMS2</i>       | 110             | <i>trans</i>          | <i>FABP4</i>           |
| 134       | <i>RTN3</i>        | 18              | <i>trans</i>          | <i>FABP4</i>           |
| 135       | <i>RXRG</i>        |                 |                       |                        |
| 136       | <i>SATB1</i>       | 17              | <i>trans</i>          | <i>ELOVL6</i>          |
| 137       | <i>SCD</i>         |                 |                       |                        |
| 138       | <i>SF3B2</i>       | 18              | <i>trans</i>          | <i>FABP4</i>           |
| 139       | <i>SH2D4B</i>      | 118             | <i>trans</i>          | <i>SLC27A4</i>         |
| 140       | <i>SLC22A11</i>    | 18              | <i>trans</i>          | <i>FABP4</i>           |
| 141       | <i>SLC22A12</i>    | 18              | <i>trans</i>          | <i>FABP4</i>           |
| 142       | <i>SLC25A45</i>    | 18              | <i>trans</i>          | <i>FABP4</i>           |
| 143       | <i>SLC27A1</i>     |                 |                       |                        |
| 144       | <i>SLC27A4</i>     |                 |                       |                        |
| 145       | <i>SLC5A6</i>      | 19              | <i>trans</i>          | <i>FABP4</i>           |
| 146       | <i>SNX15</i>       | 18              | <i>trans</i>          | <i>FABP4</i>           |
| 147       | <i>SNX17</i>       | 19              | <i>trans</i>          | <i>FABP4</i>           |
| 148       | <i>SREBF1</i>      |                 |                       |                        |
| 149       | <i>STRN</i>        | 19              | <i>trans</i>          | <i>FABP4</i>           |
| 150       | <i>SYT7</i>        | 18              | <i>trans</i>          | <i>FABP4</i>           |
| 151       | <i>TAF6L</i>       | 18              | <i>trans</i>          | <i>FABP4</i>           |
| 152       | <i>TCF23</i>       | 19              | <i>trans</i>          | <i>FABP4</i>           |
| 153       | <i>TMEM138</i>     | 18              | <i>trans</i>          | <i>FABP4</i>           |
| 154       | <i>TMEM165</i>     | 115             | <i>trans</i>          | <i>FADS2</i>           |
| 155       | <i>TNN</i>         | 112             | <i>trans</i>          | <i>FABP4</i>           |
| 156       | <i>TNR</i>         | 112             | <i>trans</i>          | <i>FABP4</i>           |
| 157       | <i>TRPT1</i>       | 18              | <i>trans</i>          | <i>FABP4</i>           |
| 158       | <i>TSPAN14</i>     | 118             | <i>trans</i>          | <i>SLC27A4</i>         |
| 159       | <i>TUT1</i>        | 18              | <i>trans</i>          | <i>FABP4</i>           |
| 160       | <i>UBR5</i>        | 110             | <i>trans</i>          | <i>FABP4</i>           |

| <b>ID</b> | <b>Target Name</b> | <b>Interval</b> | <b>Cis/Trans-eQTL</b> | <b>Associated Gene</b> |
|-----------|--------------------|-----------------|-----------------------|------------------------|
| 161       | <i>VIT</i>         | 19              | <i>trans</i>          | <i>FABP4</i>           |
| 162       | <i>VWCE</i>        | 18              | <i>trans</i>          | <i>FABP4</i>           |
| 163       | <i>XDH</i>         | 19              | <i>trans</i>          | <i>FABP4</i>           |
| 164       | <i>ZBTB40</i>      | 114             | <i>trans</i>          | <i>FADS2</i>           |
| 165       | <i>ZEB1</i>        | 116             | <i>trans</i>          | <i>FADS2</i>           |
| 166       | <i>ZMIZ1</i>       | 118             | <i>trans</i>          | <i>SLC27A4</i>         |
| 167       | <i>ZNF438</i>      | 116             | <i>trans</i>          | <i>FADS2</i>           |

**Table S10.** Pearson's correlations of *PPARG* mRNA expression and analyze-related genes.

| Gene            | Pearson correlation coefficient | p-value                |
|-----------------|---------------------------------|------------------------|
| <i>ACSM5</i>    | 0.08                            | 3.86x10 <sup>-1</sup>  |
| <i>ADIPOQ</i>   | 0.66                            | 1.78x10 <sup>-15</sup> |
| <i>AGPAT2</i>   | 0.54                            | 6.98x10 <sup>-10</sup> |
| <i>ANK2</i>     | 0.27                            | 3.93x10 <sup>-3</sup>  |
| <i>ARNT</i>     | 0.30                            | 1.42x10 <sup>-3</sup>  |
| <i>CD36</i>     | 0.70                            | 2.22x10 <sup>-16</sup> |
| <i>CPT1A</i>    | 0.03                            | 7.33x10 <sup>-1</sup>  |
| <i>CROT</i>     | 0.50                            | 1.71x10 <sup>-8</sup>  |
| <i>CYP2U1</i>   | 0.54                            | 6.01x10 <sup>-10</sup> |
| <i>DGAT1</i>    | 0.62                            | 2.53x10 <sup>-13</sup> |
| <i>DGAT2</i>    | 0.61                            | 1.09x10 <sup>-12</sup> |
| <i>EGF</i>      | 0.08                            | 4.00x10 <sup>-1</sup>  |
| <i>ELOVL5</i>   | 0.75                            | 2.22x10 <sup>-16</sup> |
| <i>ELOVL6</i>   | 0.68                            | 2.22x10 <sup>-16</sup> |
| <i>ESRRA</i>    | 0.43                            | 2.41x10 <sup>-6</sup>  |
| <i>FABP4</i>    | 0.51                            | 9.27x10 <sup>-9</sup>  |
| <i>FABP5</i>    | 0.40                            | 1.27x10 <sup>-5</sup>  |
| <i>FADS1</i>    | 0.12                            | 1.95x10 <sup>-1</sup>  |
| <i>FADS2</i>    | 0.18                            | 5.92x10 <sup>-2</sup>  |
| <i>FADS3</i>    | 0.17                            | 7.71x10 <sup>-2</sup>  |
| <i>LIPC</i>     | 0.27                            | 3.55x10 <sup>-3</sup>  |
| <i>LPIN1</i>    | 0.69                            | 2.22x10 <sup>-16</sup> |
| <i>MGLL</i>     | 0.43                            | 1.90x10 <sup>-6</sup>  |
| <i>MLXIPL</i>   | 0.61                            | 5.55x10 <sup>-13</sup> |
| <i>NFKB1</i>    | 0.58                            | 2.49x10 <sup>-11</sup> |
| <i>NR1H3</i>    | 0.56                            | 1.56x10 <sup>-10</sup> |
| <i>PEX2</i>     | 0.60                            | 1.69x10 <sup>-12</sup> |
| <i>PLA2G12A</i> | 0.61                            | 9.13x10 <sup>-13</sup> |
| <i>PLCB2</i>    | 0.13                            | 1.71x10 <sup>-1</sup>  |
| <i>PLPP1</i>    | 0.27                            | 4.16x10 <sup>-3</sup>  |
| <i>PNPLA2</i>   | 0.55                            | 3.09x10 <sup>-10</sup> |
| <i>POU2F1</i>   | 0.25                            | 7.75x10 <sup>-3</sup>  |
| <i>PPARA</i>    | 0.63                            | 1.01x10 <sup>-13</sup> |
| <i>PPARD</i>    | 0.48                            | 8.61x10 <sup>-8</sup>  |
| <i>RBP4</i>     | 0.36                            | 1.11x10 <sup>-4</sup>  |
| <i>RXRG</i>     | 0.41                            | 7.83x10 <sup>-6</sup>  |
| <i>SCAP</i>     | 0.45                            | 4.59x10 <sup>-7</sup>  |
| <i>SCD</i>      | 0.59                            | 1.01x10 <sup>-11</sup> |
| <i>SLC27A1</i>  | 0.23                            | 1.23x10 <sup>-2</sup>  |
| <i>SLC27A4</i>  | 0.23                            | 1.60x10 <sup>-2</sup>  |
| <i>SREBF1</i>   | 0.55                            | 2.63x10 <sup>-10</sup> |
| <i>USF1</i>     | 0.33                            | 4.15x10 <sup>-4</sup>  |



**Table S11.** Primers used for the characterization of the 3'UTR of porcine *FABP4* gene.

| <b>Gene</b>  | <b>Full name</b>                    | <b>Primer Name</b> | <b>Type</b>               | <b>Primer Sequence<sup>1</sup></b> |
|--------------|-------------------------------------|--------------------|---------------------------|------------------------------------|
| <i>FABP4</i> | <i>Fatty acid binding protein 4</i> | oligo(dT)-UAP      | mRNA 3' UTR amplification | 5'-GGCCACGCGTCGACTAGTAC(T)30VN-3'  |
| <i>FABP4</i> | <i>Fatty acid binding protein 4</i> | UAP                | mRNA 3' UTR amplification | 5'-GGCCACGCGTCGACTAGTAC-3'         |
| <i>FABP4</i> | <i>Fatty acid binding protein 4</i> | FABP4-3NC-1-Fw     | mRNA 3' UTR sequencing    | 5'-TTGGATCGAACTCTACAACACTCTG-3'    |
| <i>FABP4</i> | <i>Fatty acid binding protein 4</i> | FABP4-3NC-2-Fw     | mRNA 3' UTR sequencing    | 5'-TGTTTATGGATCTTCCATTATCTTAGG-3'  |

<sup>1</sup>Primers were designed from the GenBank Y16039 sequence

**Table S12.** Primers used for the analyses of gene expression of the 48 genes by real-time PCR.

| Gene          | Full name                                        | Type      | Primer sequence                   |                                    |
|---------------|--------------------------------------------------|-----------|-----------------------------------|------------------------------------|
|               |                                                  |           | Forward                           | Reverse                            |
| <i>ACSM5</i>  | Acyl-CoA synthetase medium-chain family member 5 | Target    | 5'-TGTAATCTGTGCCAATCCCAA-3'       | 5'-CATCATCTACGATCTGCACCTCAT-3'     |
| <i>ACTB</i>   | Actin, Beta                                      | Reference | 5'-CAAGGACCTCTACGCCAACAC-3'       | 5'-TGGAGGCGCGATGATCTT-3'           |
| <i>ADIPOQ</i> | Adiponectin, C1Q and collagen domain containing  | Target    | 5'-GTACCCAGGCCGTGATG-3'           | 5'-CCCTTAGGACCAGTAAGACCTGTATCT-    |
| <i>AGPAT2</i> | 1-acylglycerol-3-phosphate O-acyltransferase 2   | Target    | 5'-CATGGTCAGGAGAAGCTCAA-3'        | 5'-GCCAGGTAGAAGGCACCTTTC-3'        |
| <i>ANK2</i>   | Ankyrin 2                                        | Target    | 5'-GTGGATTCTGCTACGAAGAAAGG-3'     | 5'-AAGGACTTTGACAACCTTCTGCTTGT-3'   |
| <i>ARNT</i>   | Aryl hydrocarbon receptor nuclear translocator   | Target    | 5'-TCTAATGATAAGGAGCGGTTTGC-3'     | 5'-TATGATTTTCCCTGGCGAGTCT-3'       |
| <i>B2M</i>    | Beta-2-microglobulin                             | Reference | 5'-ACCTTCTGGTCCACACTGAGTTC-3'     | 5'-GGTCTCGATCCCCTTAACCTATCTTG-3'   |
| <i>CD36</i>   | CD36 molecule                                    | Target    | 5'-GGTCCTTACACGTACAGAGTTCGTT-3'   | 5'-CCATTGGGCTGTAGGAAAGAGA-3'       |
| <i>CPT1A</i>  | Carnitine palmitoyltransferase 1A                | Target    | 5'-CCTGAAGGTGCTGCTCTCCTA-3'       | 5'-CTCACCATCATCATCCAGATCTTG-3'     |
| <i>CROT</i>   | Carnitine O-octanoyltransferase                  | Target    | 5'-GGGAAACGAAATTGGTTGGA-3'        | 5'-CGCAAAGTTGACATTCAGTTGTG-3'      |
| <i>CYP2U1</i> | Cytochrome P450, family 2, subfamily U, member 1 | Target    | 5'-AGAGAAAACAGTGCTCCAAGGGTAT-3'   | 5'-TGGCTGGGTCTCTGTGTACTGA-3'       |
| <i>DGAT1</i>  | Diacylglycerol O-acyltransferase 1               | Target    | 5'-CCTGAATTGGTGTGTGGTCATG-3'      | 5'-GATGCCGTACTTGATGAGGTTCTC-3'     |
| <i>DGAT2</i>  | Diacylglycerol O-acyltransferase 2               | Target    | 5'-GGAACACGCCCAAGAAAGGT-3'        | 5'-GGATGGGAAAGTAGTCTCGAAAGTAG-3'   |
| <i>EGF</i>    | Epidermal growth factor                          | Target    | 5'-AACGGGAATGCCACTTGTGT-3'        | 5'-CCTTCCAAGTCAATCCTAAAGATACTG-3'  |
| <i>ELOVL5</i> | ELOVL fatty acid elongase 5                      | Target    | 5'-CCTCTCGGCTGGCTGTACTT-3'        | 5'-CCTTCTTGGTTGAGGTCTGGATGTAG-3'   |
| <i>ELOVL6</i> | ELOVL fatty acid elongase 6                      | Target    | 5'-AGCAGTTCAACGAGAACGAAGCC-3'     | 5'-TGCCGACCGCCAAAGATAAAG-3'        |
| <i>ESRRA</i>  | Estrogen-related receptor alpha                  | Target    | 5'-CAAGAGCATCCCAGGCTTCTC-3'       | 5'-CACCCAACACCAATACCTCCAT-3'       |
| <i>FABP4</i>  | Fatty acid binding protein 4                     | Target    | 5'-TAAGTTGGTGGTGAATGTATCATG-3'    | 5'-AGAGTGTGTAGAGTTCGATCCAAAC-3'    |
| <i>FABP5</i>  | Fatty acid binding protein 5                     | Target    | 5'-CCAATGGAGAATTGGTTCAACA-3'      | 5'-GTTTCATGACGCATACCACCACTA-3'     |
| <i>FADS1</i>  | Fatty acid desaturase 1                          | Target    | 5'-CCTTGTGAGGAAGTATATGAGCTCTCT-3' | 5'-TCATCTGTCAGCTCTTTATTCTTAGTCG-3' |
| <i>FADS2</i>  | Fatty acid desaturase 2                          | Target    | 5'-TCCACCGCGACCTTGATTTA-3'        | 5'-TCGGTGATCTCAGAGTTCTTGGT-3'      |
| <i>FADS3</i>  | Fatty acid desaturase 3                          | Target    | 5'-CCAGCACCTCTACTTCTTCTGAT-3'     | 5'-CATGTATGCCAGATTTTCCACTTC-3'     |

| Gene            | Full name                                                             | Type      | Primer sequence                   |                                 |
|-----------------|-----------------------------------------------------------------------|-----------|-----------------------------------|---------------------------------|
|                 |                                                                       |           | Forward                           | Reverse                         |
| <i>HPRT1</i>    | Hypoxanthine phosphoribosyltransferase 1                              | Reference | 5'- TCATTATGCCGAGGATTTGGA-3'      | 5'- CTCTTTCATCACATCTCGAGCAA-3'  |
| <i>LIPC</i>     | Lipase C, hepatic type                                                | Target    | 5'- CGTTACAGCAGTGTGGCTTCA-3'      | 5'- CCAGCAAGCCATCCATCAA-3'      |
| <i>LPIN1</i>    | Lipin 1                                                               | Target    | 5'- CCGAGAGAAGGTGGTGGACAT-3'      | 5'- CTCTCCATTGTCTCCCAGTTTCA-3'  |
| <i>MGLL</i>     | Monoglyceride lipase                                                  | Target    | 5'-GTGTTTCGCCACGACCAT-3'          | 5'-CCTGACGAACACCTGGAAGTC-3'     |
| <i>MLXIPL</i>   | MLX Interacting Protein-Like                                          | Target    | 5'-CCCAAGTGAAGAATTTCAAAGG-3'      | 5'-CTTCCTCCGCTCCACATACTG-3'     |
| <i>NFKB1</i>    | Nuclear factor kappa B subunit 1                                      | Target    | 5'-CCCACAGACGTTTCATAGACAATTT-3'   | 5'-GAGGCTGGTTTTGTAAATGTTGACA-3' |
| <i>NR1H3</i>    | Nuclear Receptor Subfamily 1, Group H, Member 3                       | Target    | 5'-CTGGGCATGATCGAGAAGCT-3'        | 5'-TGGGCCAAGGCGTGACT-3'         |
| <i>PEX2</i>     | Peroxisomal biogenesis factor 2                                       | Target    | 5'-CTCAGACTCCTAAGAAACCTTCAGAGA-3' | 5'-ACTGATTCTGAGCACTCTGTTTGC-3'  |
| <i>PLA2G12A</i> | Phospholipase A2, group XIIA                                          | Target    | 5'-CCCCTCTTTGGTGTTCATCTTAA-3'     | 5'-ATAGCACCTGTGCTGCTGGTT-3'     |
| <i>PLCB2</i>    | Phospholipase C, beta 2                                               | Target    | 5'- AGATCTTCACCTCCTACCACTCCAA-3'  | 5'- GCGCTGTTTCTGGTTGATGA-3'     |
| <i>PLPP1</i>    | Phospholipid phosphatase 1                                            | Target    | 5'-GGCCACTCTTCATTCTCCATGTAC-3'    | 5'-AGGCCACGTAATGGATACAG-3'      |
| <i>PNPLA2</i>   | Patatin-like phospholipase domain containing 2                        | Target    | 5'-CTTCACCGTCCGCTTGCT-3'          | 5'-GCATCACCAGGACTGGCAGAT-3'     |
| <i>POU2F1</i>   | POU class 2 homeobox 1                                                | Target    | 5'- CCCATACAGATCGCACAGGAT-3'      | 5'- GATGATAAACTGTGCTGGTTGCA-3'  |
| <i>PPARA</i>    | Peroxisome proliferator-activated receptor alpha                      | Target    | 5'-GGCACTGAACATCGAATGTAGAATC-3'   | 5'-CCGAAAGAAGCCCTTGCAA-3'       |
| <i>PPARD</i>    | Peroxisome proliferator-activated receptor delta                      | Target    | 5'-GCATGTCTCA CAACGCCATT-3'       | 5'-GCTGACTCCCCTCGTTTGC-3'       |
| <i>PPARG</i>    | Peroxisome proliferator-activated receptor gamma                      | Target    | 5'-TTGTGAAGGATGCAAGGGTTT-3'       | 5'-ATCCGACAGTTAAGATCGCACCTA-3'  |
| <i>PPARGC1A</i> | Peroxisome proliferator-activated receptor gamma, coactivator 1 alpha | Target    | 5'-CTCTGGAAGTGCAGGCCTAA-3'        | 5'-TGGAGAAGCCCTAAAAGGGTTAT-3'   |
| <i>RBP4</i>     | Retinol binding protein 4                                             | Target    | 5'-GGGTCGAGTCCGTCTTTTAAATAACT-3'  | 5'-GGTCCTCGGTGTCTGTAAAGGT-3'    |
| <i>RXRG</i>     | Retinoid X receptor, gamma                                            | Target    | 5'-GAGGATTCTGGAAGCTGAACTTG-3'     | 5'-TCATTCGTCGAATTCTCCATGT-3'    |
| <i>SCAP</i>     | SREBF chaperone                                                       | Target    | 5'- AGATATCTCAGGCCTTCTACAACCA-3'  | 5'- AGTTTCAACAGTGGGTAGCAGC-3'   |
| <i>SCD</i>      | Stearoyl-CoA Desaturase                                               | Target    | 5'- GGTGATGTTCCAGAGGAGGTACTAC-3'  | 5'- CAGCAATACCAGGGCAGAT-3'      |
| <i>SLC27A1</i>  | Solute carrier family 27, member 1                                    | Target    | 5'-TCACTCGGCAGGGAACATC-3'         | 5'-CGGCTGGCTGAAAACCTTCTT-3'     |
| <i>SLC27A4</i>  | Solute carrier family 27, member 4                                    | Target    | 5'-GCTGCATAAAACAGGGACTTTCA-3'     | 5'-AACAGCGGGTCTTTCACGACT-3'     |

| Gene          | Full name                                                | Type      | Primer sequence                |                                 |
|---------------|----------------------------------------------------------|-----------|--------------------------------|---------------------------------|
|               |                                                          |           | Forward                        | Reverse                         |
| <i>SREBF1</i> | Sterol Regulatory Element Binding Transcription Factor 1 | Target    | 5'-CACGGAGGCGAAGCTGAATA-3'     | 5'-GCTTCTGGTTGCTCTGCTGAA-3'     |
| <i>TBP</i>    | TATA-Box Binding Protein                                 | Reference | 5'-CAGAATGATCAAACCGAGAATTGT-3' | 5'-CTGCTCTGACTTTAGCACCTGTTAA-3' |
| <i>USF1</i>   | Upstream transcription factor 1                          | Target    | 5'- CCCTTATTCCCCGAAGTCAGA-3'   | 5'- GCGGCGTTCCACTTCATTAT-3'     |
